# A pretectal command system controls hunting behaviour

*Paride Antinucci<sup>1</sup>, Mónica Folgueira<sup>2,3</sup>, Isaac H. Bianco<sup>1</sup>*

*Affiliations:*

<sup>1</sup>Department of Neuroscience, Physiology & Pharmacology, UCL, Gower Street, London, WC1E 6BT, UK

<sup>2</sup>Department of Biology, Faculty of Sciences, University of A Coruña, Coruña 15008-A, Spain

<sup>3</sup>Centro de Investigaciones Científicas Avanzadas (CICA), University of A Coruña, Coruña 15008-A, Spain

*Key findings:*

- Pretectal neurons are recruited during hunting initiation
- Optogenetic stimulation of single pretectal neurons can induce predatory behaviour
- Ablation of pretectal neurons impairs hunting
- Pretectal cells comprise a command system controlling hunting behaviour

## 1 **Abstract**

2 For many species, hunting is an innate behaviour that is crucial for survival, yet the circuits  
3 that control predatory action sequences are poorly understood. We used larval zebrafish to  
4 identify a command system that controls hunting. By combining calcium imaging with a  
5 virtual hunting assay, we identified a discrete pretectal region that is selectively active when  
6 animals initiate hunting. Targeted genetic labelling allowed us to examine the function and  
7 morphology of individual cells and identify two classes of pretectal neuron that project to  
8 ipsilateral optic tectum or the contralateral tegmentum. Optogenetic stimulation of single  
9 neurons of either class was able to induce sustained hunting sequences, in the absence of prey.  
10 Furthermore, laser ablation of these neurons impaired prey-catching and prevented induction  
11 of hunting by optogenetic stimulation of the anterior-ventral tectum. In sum, we define a  
12 specific population of pretectal neurons that functions as a command system to drive  
13 predatory behaviour.

### 14 *Keywords:*

15 predation; command system; pretectum; optic tectum; sensorimotor processing; accessory  
16 pretectal nucleus; hunting; calcium imaging; optogenetics; zebrafish

## 17 **Introduction**

18 In response to sensory information and internal states, animals select specific actions from a  
19 repertoire of options and produce adaptive behavioural programmes. Neuroethological  
20 studies in a variety of species have pinpointed brain regions, and identified neurons, that  
21 specifically promote particular behaviours ranging from the courtship songs of fruit flies (von  
22 Philipsborn *et al.*, 2011) to parental behaviours of mice (Kohl *et al.*, 2018). Identifying the neural  
23 circuits that control specific behaviours, as well as modulatory systems that influence if and  
24 how behaviours are performed, will shed light on the neural mechanisms of decision making,  
25 action selection and motor sequence generation.

26 Prey catching is an innate, complex behaviour that is crucial for survival (Sillar *et al.*,  
27 2016). In various species, hunting responses can be evoked by prey-like stimuli, defined by  
28 specific conjunctions of sensory features (Ewert, 1997; Anjum *et al.*, 2006; Bianco and Engert,  
29 2015), and predatory behaviour is modulated by internal state variables including associative  
30 learning and feeding drive (Ewert *et al.*, 2001; Jordi *et al.*, 2015). Several brain regions show  
31 activity during hunting and are expected to subserve neural functions including prey  
32 detection and localisation, control of pursuit, capture and consummatory actions, and  
33 motivation [*e.g.* Comoli *et al.* (2005)]. Although electrical stimulation of brain regions,  
34 including the optic tectum, can evoke hunting actions (Ewert, 1970; Bels *et al.*, 2012) and recent  
35 studies in rodents have identified circuits that motivate predatory behaviour (Han *et al.*, 2017;  
36 Li *et al.*, 2018; Park *et al.*, 2018), neurons that command vertebrate hunting have yet to be  
37 identified.

38 In this study, we sought to identify a command system for control of predatory  
39 behaviour, using larval zebrafish as a vertebrate model system. Command systems comprise  
40 interneurons that are activated in association with a specific behaviour and whose activation

41 is able to induce that behaviour (Kupfermann and Weiss, 1978; Yoshihara and Yoshihara,  
42 2018). In contrast to modulatory circuits, the presence of the releasing stimulus should not be  
43 required for experimental activation of command neurons to induce the behavioural  
44 response. In larval zebrafish, hunting is an innate, visually guided behaviour, which involves  
45 a sequence of specialised oculomotor and locomotor actions. A defining characteristic is that  
46 larvae initiate hunting by rapidly converging their eyes, which substantially increases their  
47 binocular visual field (Bianco *et al.*, 2011). A high vergence angle is maintained during prey  
48 pursuit, which entails a sequence of discrete orienting turns and approach swims, which  
49 culminate in binocular fixation of prey followed by a kinematically distinct capture swim  
50 (Borla *et al.*, 2002; McElligott and O'Malley D, 2005; Bianco *et al.*, 2011; Patterson *et al.*, 2013;  
51 Trivedi and Bollmann, 2013; Marques *et al.*, 2018). Neural activity associated with prey-like  
52 visual cues has been detected in the axon terminals of a specific class of retinal ganglion cell  
53 (RGC), which terminate in retinal arborization field 7 (AF7) in the pretectum (Semmelhack *et al.*,  
54 2014). Prey-responsive pretectal cells have also been described (Muto *et al.*, 2017) as well  
55 as highly prey-selective feature-analysing neurons in the optic tectum (OT) that display non-  
56 linear mixed selectivity for conjunctions of visual features (Bianco and Engert, 2015). Premotor  
57 activity in localised tectal assemblies immediately precedes execution of hunting responses  
58 (Bianco and Engert, 2015) and optogenetic stimulation of the anterior-ventral tectal region can  
59 induce hunting-like behaviour (Fajardo *et al.*, 2013). Finally, ablation of RGC input to either  
60 AF7 or OT substantially impairs hunting (Gahtan *et al.*, 2005; Semmelhack *et al.*, 2014).

61 Based on this evidence, we hypothesised that neural circuits controlling the induction  
62 of hunting might be located in the vicinity of AF7 or OT. Our experimental requirements for  
63 identifying neurons that fulfil the criteria of a command system were (1) that they display  
64 neural activity specifically related to execution of hunting behaviour, rather than visual  
65 detection of prey, and (2) that direct stimulation of such neurons would induce naturalistic  
66 predatory behaviour in the absence of prey. First, we used 2-photon calcium imaging paired  
67 with a virtual hunting assay and identified a high density of neurons in the AF7-pretectal  
68 region that were specifically recruited when larvae initiated hunting behaviour. We identified  
69 a transgenic line that labelled these neurons and found two morphological classes: One  
70 projects ipsilaterally to the optic tectum and the second extends long-range projections to  
71 midbrain oculomotor nuclei, the nucleus of the medial longitudinal fasciculus and the  
72 contralateral hindbrain tegmentum. Remarkably, optogenetic stimulation of single pretectal  
73 neurons evoked hunting-like behaviour in the absence of prey. Pretectal projection neurons  
74 of either class could evoke hunting routines with naturalistic oculomotor and locomotor  
75 kinematics but opposite directional biases. Finally, laser-ablation of the pretectal population  
76 impaired hunting of live prey. In sum, we propose that a specific population of pretectal  
77 neurons comprises a command system that functions downstream of prey perception to  
78 control execution of predatory behaviour.

## 79 Results

### 80 Pretectal neurons are recruited during hunting initiation

81 To identify neurons with activity related to prey perception and/or initiation of hunting  
82 behaviour, we performed 2-photon calcium imaging while larval zebrafish engaged in a  
83 virtual hunting assay (Figure 1A) (Bianco and Engert, 2015). Transgenic *elavl3:H2B-*  
84 *GCaMP6s;atoh7:gapRFP* larvae (6–7 dpf, N = 8) were partially restrained in agarose gel, but  
85 with their eyes and tail free to move, and were presented with a range of visual cues including  
86 small moving prey-like spots, which evoke naturalistic hunting responses (Figure 1B) (Bianco  
87 *et al.*, 2011; Bianco and Engert, 2015). We imaged a volume that encompassed the majority of  
88 the primary retinorecipient sites [arborization fields (AFs) 2–10] as well as surrounding brain  
89 regions including pretectum and OT (310 × 310 × 100 μm volume; Figure 1C and Video 1).  
90 Eye and tail kinematics were tracked online, allowing automated detection of hunting  
91 responses, which are defined by saccadic convergence of the eyes – a unique oculomotor  
92 behaviour executed exclusively at hunting initiation (Figure 1D) (Bianco *et al.*, 2011; Patterson  
93 *et al.*, 2013; Trivedi and Bollmann, 2013; Bianco and Engert, 2015). Larvae preferentially  
94 responded to small, dark, moving spots and hunting was initiated most frequently once the  
95 stimulus had crossed the midline axis and was moving in a nose-tail direction (Figure 1E,F)  
96 (Bianco and Engert, 2015).

97 To define groups of neurons with consistent functional properties related to the first  
98 stages of hunting behaviour, we first computed, for every cell, a visuomotor vector (VMV)  
99 that quantified its sensory and motor-related activity (Figure 1G and Materials and Methods).  
100 Each VMV described (a) mean GCaMP fluorescence responses to each of the ten visual cues  
101 during non-response trials, in which larvae did not release hunting behaviour, and (b)  
102 coefficients from multilinear regression of fluorescent timeseries data on a set of motor  
103 predictors (derived from eye and tail kinematics including convergent saccades; see  
104 Supplementary File 1). Next, we used an unsupervised clustering procedure to identify  
105 consistent sensorimotor tuning profiles. A correlation-based agglomerative hierarchical  
106 clustering algorithm performed initial clustering of VMVs from cells with either high visually  
107 evoked activity or that were well modelled in terms of motor variables (see Materials and  
108 Methods). The centroids of the resultant clusters defined a set of functional archetypes and  
109 subsequently, all remaining neurons were assigned to the cluster with the closest centroid  
110 within a threshold distance limit (Pearson's  $r \geq 0.7$ , VMVs below threshold remained  
111 unassigned). This approach allowed us to classify more than 50% of imaged neurons  
112 (93,055 out of 181,123 cells) into 36 clusters with homogenous functional properties (Figure  
113 1H and Figure 1–supplement 1).

114 This analysis identified neurons that were recruited during hunting initiation.  
115 Specifically, four clusters showed activity highly correlated with eye convergence (clusters  
116 25–28; Figure 1I) yet exhibited little activity in response to visual cues (including prey-like  
117 moving spots; Figure 1J and Figure 1–supplement 2A). In two of these clusters, activity was  
118 selective for the direction of tail movements that often occur concomitantly with eye  
119 convergence during hunting initiation. Thus, cluster 26 was selective for convergences  
120 associated with leftwards turns and cluster 28 was tuned to rightwards hunting responses. By  
121 contrast, the other two clusters did not show selectivity for the direction of tail movements

122 during hunting initiation (cluster 25, associated with symmetrical/no tail movement and 27,  
123 responsive to motion in either direction). Other functional clusters comprised visually  
124 responsive neurons that were selectively activated by small prey-like moving spots (`prey-  
125 responsive` clusters 1–6; Figure 1H,I and Figure 1–supplement 2A), but displayed little motor-  
126 related activity.

127 We computed a `hunting index` (HIx) for individual neurons as a direct means to  
128 distinguish neural activity associated with hunting initiation from `sensory` activity evoked  
129 by prey-like visual stimuli. Briefly, for each hunting response, GCaMP fluorescence in a time  
130 window ( $\pm 1$  s) surrounding the convergent saccade was compared to activity at the same time  
131 in non-response trials during which the same visual stimulus was presented (Figure 1K, left).  
132 The mean of these difference measures across all response events represents the HIx score for  
133 the cell and quantifies neural activity attributable to hunting initiation while accounting for  
134 any visually evoked response. To account for directional tuning, we separately computed HIx  
135 for hunting responses paired with leftwards, rightwards or symmetrical/no tail movements.  
136 This analysis revealed that neurons in clusters 25–28 showed considerably higher HIx scores  
137 than other cells, including those in prey-responsive clusters (1 and 4, Figure 1K). Moreover,  
138 tail directional preferences were consistent with those determined by regression modelling.  
139 Overall, our functional analyses identified four clusters of neurons with activity specifically  
140 associated with the specialised motor outputs that characterise initiation of hunting behaviour  
141 and showed little activity in response to prey-like visual cues. Thus, we will refer to these as  
142 `hunting-initiation` clusters.

143 Neurons within functionally defined clusters showed distinct anatomical distributions  
144 (Figure 1–supplement 3). We showed this by registering volumetric imaging data to a  
145 reference brain atlas (`ZBB` and a high-resolution *elavl3:H2B-GCaMP6s* volume, see Materials  
146 and Methods and Video 1) (Marquart *et al.*, 2015; Marquart *et al.*, 2017). A high density of  
147 neurons belonging to hunting-initiation clusters was found in pretectal regions in the  
148 immediate vicinity of AF7 (AF7-pretectum), just anterior to the rostral pole of the optic tectum  
149 (Figure 1L,M and Figure 1–supplement 2B,C). Neurons selective for the direction of hunting-  
150 related tail motion (clusters 26 and 28) showed lateralised, mirror-symmetric distributions,  
151 with a larger fraction of cells located on the side of the brain contralateral to the direction of  
152 preferred tail movement (Figure 1L, right panel). Specifically, cluster 26, which is tuned to eye  
153 convergences associated with leftwards tail movement, had a higher density of cells in the  
154 right AF7-pretectum, and vice versa for cluster 28. Hunting-initiation clusters that were  
155 agnostic to tail direction (clusters 25 and 27) showed largely symmetric anatomical  
156 distributions (Figure 1L, middle panel). Neurons belonging to prey-responsive clusters were  
157 also found in AF7-pretectum as well as in the medial thalamus, where direction-selective  
158 neurons showed highly lateralised distributions (Figure 1L,M left panels and Figure 1–  
159 supplement 3).

160 To confirm the response properties indicated by the VMV representations and HIx  
161 scores and further examine visuomotor tuning, we computed visual stimulus-aligned and  
162 convergence-aligned activity profiles for left and right hemisphere neurons in prey-  
163 responsive and hunting-initiation clusters (Figure 1N,O). This confirmed that prey-responsive  
164 neurons in clusters 1 and 4 showed direction-selective activity in response to small dark

165 moving spots, but minimal activity associated with eye convergence (Figure 1N,O, left  
166 columns). On the other hand, hunting-initiation neurons (clusters 25–28) showed weak visual  
167 responses – as shown by moving spot-triggered activity during non-response trials – but  
168 substantial activity triggered on hunting initiation. For clusters 26 and 28, neurons showed  
169 stronger activation when convergent saccades were paired with left and right-sided turns,  
170 respectively (Figure 1N,O, right columns).

171 In summary, we identified populations of neurons in AF7-pretectum that are recruited  
172 in association with two distinct components of hunting – visual responses to prey and  
173 initiation of predatory behaviour. We subsequently examined whether cells with hunting-  
174 initiation activity are directly involved in inducing hunting behaviour.

### 175 **Pretectal neurons labelled by *KalTA4u508* with hunting-initiation activity**

176 To characterise the connectivity and function of AF7-pretectal neurons with hunting-initiation  
177 activity, we inspected the expression patterns of a range of transgenic driver lines and  
178 identified a transgene, *KalTA4u508*, which preferentially labels neurons in the AF7-pretectal  
179 region (Figure 2A–C). Anatomical registration of *KalTA4u508;UAS:mCherry* volumetric data  
180 to the reference atlas revealed a high density of labelled somata in AF7-pretectum,  
181 overlapping with the locations of hunting-initiation clusters (Figure 2A,B,I). We generated  
182 *KalTA4u508;UAS:RFP;atoh7:GFP* larvae to visualise GFP-labelled RGC axon terminals in AF7,  
183 and observed that a subset of *KalTA4u508*-expressing neurons extend dendritic arbours that  
184 directly juxtapose RGC terminals (N = 4 fish; Figure 2C,D). In brain sections from adult  
185 (3 month old) *KalTA4u508;UAS:GCaMP6f;atoh7:gapRFP* fish, labelled neurons in the  
186 pretectum were very sparse and could be identified only in the accessory pretectal nucleus  
187 (APN) (n = 8 somata from N = 4 fish; Figure 2E). This suggests that at least a subset of  
188 *KalTA4u508*-expressing neurons reside in a region of the larval AF7-pretectum corresponding  
189 to the adult APN.

190 To reveal the morphology of *KalTA4u508* neurons, we used a transient expression  
191 strategy to label individual cells by microinjection of a *UAS:CoChR-tdTomato* DNA construct  
192 into one-cell stage *KalTA4u508;elavl3:H2B-GCaMP6s* embryos. High-contrast membrane  
193 labelling by CoChR-tdTomato facilitated morphological reconstruction of single neurons  
194 (at 6–7 dpf) and tracings were registered to the brain atlas using the H2B-GCaMP6s channel  
195 (Figure 2F,H).

196 We identified three morphological classes of prepectal neuron labelled by *KalTA4u508*.  
197 One class projects to the ipsilateral optic tectum (Figure 2F), elaborating axon terminal arbours  
198 preferentially in the most anterior-ventral aspect of OT (n = 4 cells from 4 fish; Figure 2G). The  
199 second class makes descending projections to the midbrain and hindbrain tegmentum. Axons  
200 decussate near the nucleus of the medial longitudinal fasciculus (nMLF) and the oculomotor  
201 nucleus (nIII) before extending caudally into the contralateral ventral hindbrain. Axon  
202 collaterals could be observed bilaterally in the vicinity of nIII/nMLF and proximal to ventral  
203 reticulospinal neurons in the contralateral hindbrain (n = 5 cells from 5 fish; Figure 2H). This  
204 class of projection neuron extended dendrites within a neuropil region that includes AF7  
205 (Figure 2H'), a feature not observed in the other two classes. The third class was characterised  
206 by ipsilateral axonal projections to the medial region of the corpus cerebellum (n = 2 cells from

207 2 fish; Figure 2–supplement 1A). Neurite tracing using photoactivatable GFP confirmed a  
208 pretectal projection to the cerebellum (Figure 2–supplement 1C) as well as to nIII/nMLF and  
209 contralateral ventral hindbrain (Figure 2–supplement 1B). This latter projection pattern is  
210 compatible with data on APN efferent projections in adult zebrafish (Yanez *et al.*, 2018). In  
211 combination with our adult expression data (Figure 2E), we conclude that the subset of  
212 *KalTA4u508* pretectal neurons projecting to contralateral hindbrain belong to the larval APN.

213 Next, we asked whether *KalTA4u508* pretectal neurons are responsive to prey-like  
214 stimuli and/or are recruited during hunting initiation. We performed 2-photon calcium  
215 imaging in *KalTA4u508;UAS:GCaMP6f* or *KalTA4u508;UAS:GCaMP7f* transgenic larvae  
216 during the virtual hunting assay (6–7 dpf, N = 30 fish). Notably, *KalTA4u508* pretectal neurons  
217 exhibited negligible activity in response to visual stimuli (Figure 2M and Figure 2–  
218 supplement 1E). Visuomotor vectors were generated for individual cells allowing ~51% to be  
219 assigned cluster identities based on the functional archetypes established previously using  
220 pan-neuronal imaging (correlation threshold = 0.7, n = 188 out of 369 cells).

221 Of the *KalTA4u508* cells assigned functional identities, 28% were associated with  
222 hunting-initiation clusters (clusters 25–28; 52/188 cells; Figure 2J,K). The remaining neurons  
223 were assigned to either conjugate eye movement clusters (57%) or tail movement clusters  
224 (15%) and, in line with the absence of visual sensory responses, no cells were assigned to prey-  
225 responsive clusters. Of the hunting-initiation neurons, most *KalTA4u508* cells were associated  
226 with functional clusters 26 and 28 which show preference for tail direction coincident with  
227 eye convergence (Figure 2K,N). As before, *KalTA4u508* pretectal neurons in these two clusters  
228 were predominantly located contralateral to the direction of preferred tail movement  
229 (73% and 80% contralateral for cluster identities 26 and 28, respectively; Figure 2J,N).  
230 *KalTA4u508* cells assigned to hunting-initiation clusters had higher HIX scores than those  
231 assigned to other clusters, supporting the hunting-response specificity of their activity (Figure  
232 2L,N).

233 In summary, *KalTA4u508* provides genetic access to a subset of AF7-pretectal neurons  
234 that are selectively active during initiation of hunting behaviour.

### 235 **Optogenetic activation of single *KalTA4u508* pretectal neurons induces hunting**

236 To test whether *KalTA4u508* pretectal cells are capable of inducing predatory behaviour, we  
237 optogenetically stimulated single neurons while using high-speed tracking to monitor free-  
238 swimming behaviour (Figure 3A). To do this, we used the same larvae described above in  
239 which single *KalTA4u508* pretectal cells expressed the optogenetic actuator CoChR-tdTomato  
240 (Figure 3B) (Klapoetke *et al.*, 2014). Experiments consisted of repeated trials, each of 8 s  
241 duration, in which larvae (6–7 dpf, N = 70) were exposed to 7 s blue light stimulation (470 nm,  
242 0.44 mW/mm<sup>2</sup>), interleaved with trials with no stimulation.

243 Strikingly, we found that optogenetic stimulation of individual *KalTA4u508* pretectal  
244 neurons could induce sustained, hunting-like behavioural routines. The fraction of  
245 *KalTA4u508* pretectal neurons that induced hunting (32%, 23 out of 70 cells) was similar to the  
246 proportion that were assigned to hunting-initiation clusters (28%; Figure 2K). As in  
247 naturalistic hunting, optogenetically induced hunting routines were initiated with convergent

248 saccades accompanied by lateralised swim bouts (Figure 3C) and often continued for several  
249 seconds (Figure 3D,E, and Video 2). Hunting-like responses were entirely dependent on blue  
250 light stimulation. For responsive fish we observed 18.1% median response probability in LED-  
251 On trials vs. 0% in LED-Off trials ( $p < 0.0001$ ,  $N = 23$  fish; Figure 3F). Furthermore, control  
252 experiments demonstrated that opsin-negative animals do not produce hunting behaviours  
253 in response to blue light stimulation alone (Figure 4–supplement 1I,J). By examining single-  
254 cell morphology, we found that the *KalTA4u508* cells that could evoke hunting behaviour  
255 belonged to the projection classes that innervated the ipsilateral optic tectum (9/23 cells,  
256 hereafter abbreviated ‘ipsi-projecting’) or that belong to the presumptive APN and connect to  
257 the contralateral tegmentum (14/23 cells, ‘contra-projecting’; Figure 3G,H).

258 How closely do the hunting-like routines induced by optogenetic stimulation of  
259 *KalTA4u508* pretectal neurons compare to hunting behaviour? To address this question, we  
260 compared a variety of oculomotor and locomotor kinematics between optogenetically  
261 induced hunting routines versus hunting of live *Paramecia*. We observed no difference in mean  
262 or maximum ocular vergence angles between the two types of routine, and the duration of  
263 hunting sequences, defined by the period of elevated ocular vergence, was equivalent  
264 between natural and optogenetically evoked behaviour (Figure 3I–K). We analysed kinematic  
265 features of swim bouts associated with the convergent saccade that initiates hunting,  
266 focussing on features that distinguish hunting swims from swim bouts used during  
267 spontaneous exploratory behaviour. This revealed a high degree of kinematic similarity  
268 between natural hunting bouts and optogenetically induced hunting bouts. In both cases,  
269 swim bouts contained a highly lateralised sequence of half-beats (‘bout asymmetry’; Figure  
270 3L, see Materials and Methods for details), a large fraction of curvature was localised to the  
271 distal segments of the tail (Figure 3M) and bouts displayed low tail beat frequency (Figure  
272 3N). Notably, all such parameters were significantly different as compared to spontaneous  
273 swims. Optogenetically induced hunting bouts showed a reduction in average vigour and  
274 theta-1 angles (maximum tail angle during the first half beat) compared to bouts during  
275 *Paramecia* hunting (Figure 3O,P). However, the latter displayed a bimodal distribution of  
276 theta-1 and optogenetically induced hunting bouts overlapped with the lower amplitude  
277 component of this distribution (Figure 3P, bottom). In sum, our data indicate that optogenetic  
278 stimulation of single *KalTA4u508* pretectal neurons can induce naturalistic hunting-like  
279 behaviour.

280 Next, we compared hunting routines induced by optogenetic activation of ipsi- versus  
281 contra-projecting *KalTA4u508* neurons. We did not observe differences in response latency  
282 (Figure 3Q), sequence duration (Figure 3–supplement 1A) or oculomotor or tail kinematics  
283 (Figure 3–supplement 1B–F). However, the laterality of evoked hunting responses differed  
284 between the two projection classes (Figure 3R,S): Stimulation of ipsi-projecting *KalTA4u508*  
285 pretectal neurons most frequently induced hunting in which the first swim bout was oriented  
286 in the ipsilateral direction (*i.e.* a left pretectal neuron evoked leftward turning). By contrast,  
287 contra-projecting neurons most frequently induced contralaterally directed hunting  
288 responses, as might be expected from their axonal projections to contralateral tegmentum.

289 To directly establish whether the *KalTA4u508* pretectal neurons than can drive  
290 predatory behaviour are the same cells that are recruited during visually evoked hunting, we



291 combined optogenetic stimulation and functional calcium imaging of single neurons. To  
292 achieve this, we first established that optogenetic stimulation of a given *KalTA4u508* pretectal  
293 neuron could induce hunting and then tethered the larva in agarose and performed calcium  
294 imaging of H2B-GCaMP6s, expressed in the nucleus of the same neuron, while the animal  
295 engaged in the virtual hunting assay. Visuomotor fingerprinting and cluster assignment of  
296 these neurons showed that they all belonged to hunting-initiation clusters (clusters 25–27) and  
297 had high Hlx scores (n = 6 cells from 6 fish; Figure 3T).

298 In summary, *KalTA4u508* labels a specific group of pretectal neurons that are recruited  
299 during hunting initiation and which are capable of inducing naturalistic predatory behaviour  
300 in the absence of prey.

### 301 **Ablation of *KalTA4u508* pretectal neurons impairs hunting**

302 To what extent are *KalTA4u508* pretectal neurons required for hunting? To address this  
303 question, we assessed hunting performance in freely swimming larvae provided with  
304 *Paramecia*, both before and after laser-ablation of *KalTA4u508* pretectal neurons (Figure 4A–  
305 C). To enable evaluation of the specificity of behavioural phenotypes, we also presented  
306 looming stimuli and drifting gratings to test visually evoked escape and optomotor response  
307 (OMR), respectively. Ablations were performed at 6 dpf in *KalTA4u508;UAS:mCherry* larvae  
308 and their efficacy was confirmed by reimaging the pretectum the following day. We estimated  
309 that ~90% of the fluorescently labelled *KalTA4u508* pretectal population was typically ablated  
310 in both brain hemispheres (Figure 4D,E). Behaviour was tested both before (6 dpf) and after  
311 ablation (7 dpf) and control larvae underwent the same manipulations, other than laser-  
312 ablation, and were tested at the same time-points.

313 Analysis of prey consumption revealed that ablation of *KalTA4u508* pretectal neurons  
314 resulted in decreased hunting performance (Figure 4F). Further analysis revealed that this  
315 reduction in prey capture was associated with a reduced rate of hunting initiation (Figure 4G)  
316 as well as a reduction in the duration of hunting routines (Figure 4H). By contrast, we did not  
317 observe changes in average swim speeds, loom-evoked escapes or OMR performance (Figure  
318 4I–L) and control larvae did not show changes in any of the tested behaviours between 6 and  
319 7 dpf (Figure 4–supplement 2A–G). Together, these results indicate that *KalTA4u508* pretectal  
320 neurons are specifically required for normal initiation and maintenance of predatory  
321 behaviour.

322 Optogenetic stimulation of the anterior-ventral optic tectum (avOT) in  
323 *elavl3:itTA;Ptet:ChR2-YFP* transgenic larvae has been previously reported to induce  
324 convergent saccades and J-turns (Fajardo *et al.*, 2013). We examined ChR2-YFP expression in  
325 6 dpf *elavl3:itTA;Ptet:ChR2-YFP* larvae and confirmed that the opsin is highly expressed in  
326 avOT as well as AF7 (Figure 4–supplement 1A,C), but is absent from *KalTA4u508* pretectal  
327 neurons (Figure 4–supplement 1E). The expression of ChR2 in AF7 raised the possibility that  
328 stimulation of the axon terminals of the prey-responsive RGCs that innervate this AF  
329 (Semmelhack *et al.*, 2014) might contribute to the hunting behaviour observed in this  
330 transgenic line. However, by crossing *elavl3:itTA;Ptet:ChR2-YFP* to the *lakritz* mutant, in which  
331 no RGCs are generated (Kay *et al.*, 2001), we found that retinally blind (*lak<sup>-/-</sup>*) transgenic  
332 animals were in fact more likely to display optogenetically induced hunting than their sighted

333 (*lak<sup>+/+</sup>* or *lak<sup>+/-</sup>*) siblings (Figure 4–supplement 1,F–I and Video 3). In addition, responsive *lak<sup>-/-</sup>*  
334 transgenics showed an increased probability of optogenetically induced hunting events,  
335 longer hunting routine durations and a substantial reduction in response latency (Figure 4–  
336 supplement 1J–L). These data are compatible with the conclusion of Fajardo *et al.* (2013),  
337 namely that optogenetic stimulation of avOT elicits hunting in *elavl3:itTA;Ptet:ChR2-YFP* and  
338 indicate that RGC stimulation (either visually with bright blue light, or optogenetically)  
339 interferes with induction of hunting responses.

340 To assess if AF7-pretectal circuits are required for such tectally induced hunting-like  
341 behaviour, we tested whether hunting could be evoked by optogenetic stimulation of avOT  
342 in larvae in which *KalTA4u508* pretectal cells were ablated. Following laser-ablation of  
343 *KalTA4u508* neurons in *elavl3:itTA;Ptet:ChR2-YFP;KalTA4u508;UAS:mCherry* larvae, we  
344 observed that the probability of optogenetically induced hunting was substantially reduced  
345 (Figure 4M). By contrast, control larvae showed no change in response probability between 6  
346 and 7 dpf (Figure 4–supplement 2H).

347 In summary, these data indicate that *KalTA4u508* pretectal neurons contribute to the  
348 initiation and maintenance of natural hunting behaviour and are required for release of  
349 predatory behaviour by circuits in the anterior optic tectum.

## 350 Discussion

351 In this study we combined multi-photon calcium imaging, single-cell optogenetic stimulation  
352 and laser-ablations to identify a population of pretectal neurons that commands hunting  
353 behaviour. Calcium imaging during naturalistic behaviour revealed that *KalTA4u508*  
354 pretectal neurons are recruited when larval zebrafish initiate hunting. Optogenetic activation  
355 of single *KalTA4u508* pretectal cells could release predatory behaviour in the absence of prey,  
356 and ablation of these cells impaired both natural hunting as well as hunting-like behaviour  
357 evoked by avOT stimulation. Based on functional and anatomical data, we propose that  
358 *KalTA4u508* pretectal cells comprise a command system linking visual perception of prey-like  
359 stimuli to activation of tegmental pattern generating circuits that coordinate specialised  
360 hunting motor programmes.

### 361 A command system controlling predatory behaviour in AF7-pretectum

362 Our data support the idea that *KalTA4u508* pretectal neurons satisfy the criteria for a  
363 command system for induction of predatory behaviour. A command neuron has been defined  
364 as `a neuron that is both necessary and sufficient for the initiation of a given behaviour`  
365 (Kupfermann and Weiss, 1978). Although a small number of striking examples of such cells  
366 have been identified in invertebrate models (Frost and Katz, 1996; Flood *et al.*, 2013), it is  
367 recognised that the `necessity` criterion is unlikely to be fulfilled in larger nervous systems  
368 where individual neurons display functional redundancy (Yoshihara and Yoshihara, 2018).  
369 Thus, command systems (sometimes referred to as decision neurons, command-like neurons  
370 or higher-order neurons) have been defined as interneurons that are active in association with  
371 a well-defined behaviour and whose activity can induce that behaviour, but without the strict  
372 necessity requirement (Jing, 2009; Yoshihara and Yoshihara, 2018). *KalTA4u508* pretectal  
373 neurons satisfy these criteria. First, these cells are recruited during naturalistic hunting. By  
374 comparing neural activity in response versus non-response trials we were able to  
375 disambiguate `sensory` activity, evoked by prey-like visual cues, from activity specifically  
376 associated with execution of hunting behaviour. We discovered that *KalTA4u508* pretectal  
377 neurons, located close to AF7, show minimal, if any, activity in response to prey-like stimuli  
378 but are reliably activated when larvae release convergent saccades at the commencement of  
379 hunting. Strikingly, optogenetic stimulation of single *KalTA4u508* neurons could evoke  
380 sustained hunting routines. Crucially, this induction occurred in the absence of any prey-like  
381 stimulus, indicating that these neurons directly command predatory behaviour and function  
382 downstream of the perceptual recognition of prey, rather than having a positive modulatory  
383 (`motivating`) action on sensorimotor activity. This is one of the first examples of a  
384 behavioural action sequence induced by activation of a single neuron in a vertebrate.

385 Ablations targeting *KalTA4u508* pretectal neurons impaired, but did not eliminate,  
386 hunting. One contributing factor is likely to be that ablations were incomplete. We observed  
387 that 10% of labelled *KalTA4u508* neurons survived ablation and due to variegation of  
388 transgene expression (Akitake *et al.*, 2011), this is probably a lower bound on the size of the  
389 surviving pretectal population. Notably, the observation that hunting can be evoked by  
390 stimulation of only a single neuron suggests few surviving cells could in principle suffice to  
391 release predatory behaviour. Although our behavioural epistasis test revealed that hunting  
392 evoked by stimulation of anterior-ventral OT was strongly diminished in *KalTA4u508*-ablated

393 animals, we do not rule out the possibility that there might be redundant, distributed circuitry  
394 involved in hunting initiation.

395 Overall, our data identify a discrete population of pretectal neurons that comprise a  
396 command system controlling predatory hunting.

### 397 **Neural circuitry controlling visually guided hunting**

398 How might these pretectal neurons fit within a sensorimotor pathway controlling visually  
399 guided hunting (Figure 4N)? Current evidence suggests visual recognition of prey is mediated  
400 by tectal and/or pretectal circuits. The axon terminals of zebrafish `projection class 2` retinal  
401 ganglion cells in AF7 appear tuned to prey-like stimuli (Semmelhack *et al.*, 2014) and a  
402 subpopulation of tectal neurons show non-linear mixed selectivity for conjunctions of visual  
403 features that best evoke predatory responses (Bianco and Engert, 2015). In accordance with  
404 these findings, we observed prey-responsive neurons in tectum and AF7-pretectum which  
405 were activated by small moving spots regardless of whether or not the animal produced a  
406 hunting response. Ablations of either AF7 or tectal neuropil have been shown to substantially  
407 impair hunting (Gahtan *et al.*, 2005; Semmelhack *et al.*, 2014), compatible with an important  
408 function for these retinorecipient regions in visual perception of prey.

409 Command systems are thought to sit at the sensorimotor `watershed`, linking sensory  
410 processing to activation of motor hierarchies. Our data support a circuit organisation where  
411 downstream of prey detection, the recruitment of *KalTA4u508* pretectal neurons might be the  
412 neural event that corresponds to the decision of the animal to initiate hunting. The dendritic  
413 arbours of these pretectal neurons lie in immediate apposition to RGC terminals in AF7,  
414 suggesting a biological interface for transforming visual sensory activity into premotor  
415 commands to release behaviour. Photoactivation data also suggests the AF7-pretectal region  
416 is closely interconnected with ipsilateral OT (Figure 2–supplement 1D), providing a further  
417 route for visual prey detectors in OT to recruit a hunting response. Consistent with this, our  
418 ablation data indicate that induction of hunting by stimulation of anterior-ventral OT (Fajardo  
419 *et al.*, 2013) requires *KalTA4u508* pretectal neurons.

420 Two morphological classes of *KalTA4u508* neuron were able to induce predatory  
421 behaviour with similar efficacy and motor kinematics, but opposite directional biases. Both  
422 morphologies appear similar to neurons previously identified in the AF7 region by  
423 Semmelhack *et al.* (2014). Contralaterally projecting neurons extended axon collaterals around  
424 the nMLF and oculomotor nuclei as well as in close apposition to reticulospinal neurons in  
425 the hindbrain. This projection pattern, as well as the identification of *KalTA4u508* neurons in  
426 adult brain sections, suggests these cells reside in the larval zebrafish APN. Their axonal  
427 projections provide a pathway by which pretectal commands could recruit tegmental motor  
428 pattern generators to produce the specialised eye and tail movements observed during  
429 hunting (McElligott and O'Malley D, 2005; Bianco *et al.*, 2011; Marques *et al.*, 2018).  
430 Optogenetic stimulation of ipsilaterally projecting *KalTA4u508* neurons evoked hunting  
431 routines in which the first orienting turn displayed an ipsilateral bias. It is possible that this  
432 arises from recruitment of tectal efferent pathways to the ipsilateral tegmentum, which have  
433 recently been suggested to mediate prey-directed orienting turns (Helmbrecht *et al.*, 2018).

434 Whilst it is remarkable that stimulation of single pretectal neurons could induce  
435 hunting-like behaviour in the absence of prey, natural hunting is a precise orienting behaviour  
436 directed towards a (visual) target. Optogenetically induced hunting routines involved swim  
437 bouts where turn angle fell within the lower portion of the distribution measured during prey

438 hunting. A probable explanation is that in the presence of prey, appropriate steering signals  
439 derive from OT to guide lateralised orienting turns. Compact tectal assemblies show premotor  
440 activity immediately preceding hunting initiation and are anatomically localised in relation  
441 to the directionality of hunting responses (Bianco and Engert, 2015). Furthermore, focal  
442 stimulation of the retinotopic tectal map has long been known to evoke goal-directed  
443 orienting responses including predatory manoeuvres (Herrero *et al.*, 1998; Bels *et al.*, 2012).  
444 We hypothesise that pretectal activity releases predatory behaviour and operates in parallel  
445 with prey-directed steering signals, most likely from OT.

446 Command systems have been identified that evoke both discrete actions (Korn and  
447 Faber, 2005) as well as entire behavioural programmes (Flood *et al.*, 2013). Constant  
448 stimulation of pretectal *KalTA4u508* neurons produces extended hunting sequences that  
449 commenced with saccadic eye convergence followed by serial execution of multiple swim  
450 bouts during which elevated ocular vergence – a hallmark of predatory behaviour – was  
451 maintained. This suggests that the function of pretectal activity is to command the overall  
452 hunting programme and that individual component actions (*i.e.* discrete tracking swim bouts)  
453 might be coordinated by downstream motor pattern generating circuits.

#### 454 **Control and modulation of predatory behaviour**

455 In recent years, several studies in rodents have demonstrated that pathways converging on  
456 the periaqueductal grey (PAG) can potently modulate predatory behaviour. The central  
457 amygdala (CeA) displays activity changes during hunting (Comoli *et al.*, 2005) and  
458 optogenetic activation of the CeA→ventral PAG pathway motivates prey pursuit (Han *et al.*,  
459 2017). Stimulation of the medial preoptic area to vPAG pathway promotes  
460 acquisition/handling (grabbing, biting) of objects, including prey (Park *et al.*, 2018), and  
461 activation of a GABAergic projection from lateral hypothalamus to lateral/ventrolateral PAG  
462 motivates attack on prey (Li *et al.*, 2018). In these studies, predatory behaviour was induced  
463 in the presence of prey/prey-like stimuli, suggesting these pathways serve to motivate, rather  
464 than command, hunting. In future studies, it will be interesting to examine the roles of  
465 mammalian thalamic pretectal nuclei as well as the superior colliculus, in commanding and  
466 directing predatory responses. Command systems represent a key circuit node for integration  
467 of sensory information with internal state signals (Flood *et al.*, 2013). In the context of  
468 vertebrate hunting, it will be important to elucidate the circuit mechanisms by which regions  
469 such as lateral hypothalamus modulate the recruitment probability of hunting command  
470 systems, enabling animals to vary the expression of predatory behaviour in accordance with  
471 internal drives, experience and competing behavioural demands.

472 **Acknowledgements**

473 The authors thank members of the Bianco lab, David Attwell, Tiago Branco, Tara Keck and  
474 Steve Wilson for helpful discussions and critical feedback on the manuscript and UCL Fish  
475 Facility staff for fish care and husbandry. We thank Richard Poole for help with the laser-  
476 ablation system and Claire Wyart for sharing the *Tg(UAS:GCaMP6f,cryaa:mCherry)<sup>icm06Tg</sup>* line  
477 prior to publication. Joanna Lau kindly provided the schematic in Figure 1A and Pedro  
478 Henriques provided the anatomical mask of the *chata<sup>+</sup>* nucleus isthmi in ZBB coordinates. P.A.  
479 was supported by a Sir Henry Wellcome Postdoctoral Fellowship (204708/Z/16/Z). I.H.B.  
480 was supported by a Sir Henry Dale Fellowship from the Royal Society & Wellcome Trust  
481 (101195/Z/13/Z) and a UCL Excellence Fellowship.

482 **Author Contributions**

483 Conceptualization and Experimental Design: P.A. and I.H.B.; Data Collection: P.A. with  
484 exception of adult neuroanatomy data collected by M.F.; Analysis: P.A.; Writing: P.A. and  
485 I.H.B.; Funding Acquisition: P.A and I.H.B.

486 **Competing interests**

487 The authors declare that no competing interests exist.

## 488 **References**

- 489 Akitake, C.M., Macurak, M., Halpern, M.E., and Goll, M.G. (2011). Transgenerational analysis of  
490 transcriptional silencing in zebrafish. *Dev Biol* 352, 191-201.
- 491 Anjum, F., Turni, H., Mulder, P.G., van der Burg, J., and Brecht, M. (2006). Tactile guidance of  
492 prey capture in Etruscan shrews. *Proc Natl Acad Sci U S A* 103, 16544-16549.
- 493 Auer, T.O., Durore, K., De Cian, A., Concordet, J.P., and Del Bene, F. (2014). Highly efficient  
494 CRISPR/Cas9-mediated knock-in in zebrafish by homology-independent DNA repair. *Genome Res*  
495 24, 142-153.
- 496 Avants, B.B., Tustison, N.J., Song, G., Cook, P.A., Klein, A., and Gee, J.C. (2011). A reproducible  
497 evaluation of ANTs similarity metric performance in brain image registration. *Neuroimage* 54, 2033-  
498 2044.
- 499 Bels, V.L., Aerts, P., Chardon, M., Vandewalle, P., Berkhoudt, H., Crompton, A., de Vree, F.,  
500 Dullemeijer, P., Ewert, J., and Frazzetta, T. (2012). Biomechanics of feeding in vertebrates, Vol 18  
501 (Springer Science & Business Media).
- 502 Bianco, I.H., and Engert, F. (2015). Visuomotor transformations underlying hunting behavior in  
503 zebrafish. *Curr Biol* 25, 831-846.
- 504 Bianco, I.H., Kampff, A.R., and Engert, F. (2011). Prey capture behavior evoked by simple visual  
505 stimuli in larval zebrafish. *Front Syst Neurosci* 5, 101.
- 506 Bianco, I.H., Ma, L.H., Schoppik, D., Robson, D.N., Orger, M.B., Beck, J.C., Li, J.M., Schier,  
507 A.F., Engert, F., and Baker, R. (2012). The tangential nucleus controls a gravito-inertial vestibulo-  
508 ocular reflex. *Curr Biol* 22, 1285-1295.
- 509 Borla, M.A., Palecek, B., Budick, S., and O'Malley, D.M. (2002). Prey capture by larval zebrafish:  
510 evidence for fine axial motor control. *Brain Behav Evol* 60, 207-229.
- 511 Brainard, D.H. (1997). The Psychophysics Toolbox. *Spat Vis* 10, 433-436.
- 512 Breiman, L., Meisel, W., and Purcell, E.J.T. (1977). Variable kernel estimates of multivariate  
513 densities. *Technometrics* 19, 135-144.
- 514 Comoli, E., Ribeiro-Barbosa, E.R., Negrao, N., Goto, M., and Canteras, N.S. (2005). Functional  
515 mapping of the prosencephalic systems involved in organizing predatory behavior in rats.  
516 *Neuroscience* 130, 1055-1067.
- 517 Dana, H., Sun, Y., Mohar, B., Hulse, B., Hasseman, J.P., Tsegaye, G., Tsang, A., Wong, A., Patel,  
518 R., Macklin, J.J., *et al.* (2018). High-performance GFP-based calcium indicators for imaging activity  
519 in neuronal populations and microcompartments. bioRxiv, 434589.
- 520 Davison, J.M., Akitake, C.M., Goll, M.G., Rhee, J.M., Gosse, N., Baier, H., Halpern, M.E., Leach,  
521 S.D., and Parsons, M.J. (2007). Transactivation from Gal4-VP16 transgenic insertions for tissue-  
522 specific cell labeling and ablation in zebrafish. *Dev Biol* 304, 811-824.
- 523 Distel, M., Wullimann, M.F., and Koster, R.W. (2009). Optimized Gal4 genetics for permanent  
524 gene expression mapping in zebrafish. *Proc Natl Acad Sci U S A* 106, 13365-13370.

- 525 Dunn, T.W., Gebhardt, C., Naumann, E.A., Riegler, C., Ahrens, M.B., Engert, F., and Del Bene,  
526 F. (2016). Neural Circuits Underlying Visually Evoked Escapes in Larval Zebrafish. *Neuron* 89, 613-  
527 628.
- 528 Ewert, J.P. (1970). Neural mechanisms of prey-catching and avoidance behavior in the toad (*Bufo*  
529 *bufo* L.). *Brain Behav Evol* 3, 36-56.
- 530 Ewert, J.P. (1997). Neural correlates of key stimulus and releasing mechanism: a case study and two  
531 concepts. *Trends Neurosci* 20, 332-339.
- 532 Ewert, J.P., Buxbaum-Conradi, H., Dreisvogl, F., Glasgow, M., Merkel-Harff, C., Rottgen, A.,  
533 Schurg-Pfeiffer, E., and Schwippert, W.W. (2001). Neural modulation of visuomotor functions  
534 underlying prey-catching behaviour in anurans: perception, attention, motor performance, learning.  
535 *Comp Biochem Physiol A Mol Integr Physiol* 128, 417-461.
- 536 Fajardo, O., Zhu, P., and Friedrich, R.W. (2013). Control of a specific motor program by a small  
537 brain area in zebrafish. *Front Neural Circuits* 7, 67.
- 538 Flood, T.F., Iguchi, S., Gorczyca, M., White, B., Ito, K., and Yoshihara, M. (2013). A single pair of  
539 interneurons commands the *Drosophila* feeding motor program. *Nature* 499, 83-87.
- 540 Frost, W.N., and Katz, P.S. (1996). Single neuron control over a complex motor program. *Proc Natl*  
541 *Acad Sci U S A* 93, 422-426.
- 542 Gahtan, E., Tanger, P., and Baier, H. (2005). Visual prey capture in larval zebrafish is controlled by  
543 identified reticulospinal neurons downstream of the tectum. *J Neurosci* 25, 9294-9303.
- 544 Han, W., Tellez, L.A., Rangel, M.J., Jr., Motta, S.C., Zhang, X., Perez, I.O., Canteras, N.S.,  
545 Shammah-Lagnado, S.J., van den Pol, A.N., and de Araujo, I.E. (2017). Integrated Control of  
546 Predatory Hunting by the Central Nucleus of the Amygdala. *Cell* 168, 311-324.e318.
- 547 Helmbrecht, T.O., Dal Maschio, M., Donovan, J.C., Koutsouli, S., and Baier, H. (2018).  
548 Topography of a Visuomotor Transformation. *Neuron* 100, 1429-1445.e1424.
- 549 Herrero, L., Rodriguez, F., Salas, C., and Torres, B. (1998). Tail and eye movements evoked by  
550 electrical microstimulation of the optic tectum in goldfish. *Exp Brain Res* 120, 291-305.
- 551 Horstick, E.J., Jordan, D.C., Bergeron, S.A., Tabor, K.M., Serpe, M., Feldman, B., and Burgess,  
552 H.A. (2015). Increased functional protein expression using nucleotide sequence features enriched in  
553 highly expressed genes in zebrafish. *Nucleic Acids Res* 43, e48.
- 554 Jing, J. (2009). Command systems. In *Encyclopedia of neuroscience* (Elsevier Ltd), pp. 1149-1158.
- 555 Jordi, J., Guggiana-Nilo, D., Soucy, E., Song, E.Y., Lei Wee, C., and Engert, F. (2015). A high-  
556 throughput assay for quantifying appetite and digestive dynamics. *Am J Physiol Regul Integr Comp*  
557 *Physiol* 309, R345-357.
- 558 Kawashima, T., Zwart, M.F., Yang, C.T., Mensh, B.D., and Ahrens, M.B. (2016). The Serotonergic  
559 System Tracks the Outcomes of Actions to Mediate Short-Term Motor Learning. *Cell* 167, 933-  
560 946.e920.
- 561 Kay, J.N., Finger-Baier, K.C., Roeser, T., Staub, W., and Baier, H. (2001). Retinal ganglion cell  
562 genesis requires lakritz, a Zebrafish atonal Homolog. *Neuron* 30, 725-736.



- 563 Klapoetke, N.C., Murata, Y., Kim, S.S., Pulver, S.R., Birdsey-Benson, A., Cho, Y.K., Morimoto,  
564 T.K., Chuong, A.S., Carpenter, E.J., Tian, Z., *et al.* (2014). Independent optical excitation of distinct  
565 neural populations. *Nat Methods* 11, 338-346.
- 566 Knafo, S., Fidelin, K., Prendergast, A., Tseng, P.-E.B., Parrin, A., Dickey, C., Böhm, U.L.,  
567 Figueiredo, S.N., Thouvenin, O., Pascal-Moussellard, H., *et al.* (2017). Mechanosensory neurons  
568 control the timing of spinal microcircuit selection during locomotion. *Elife* 6, e25260.
- 569 Kohl, J., Babayan, B.M., Rubinstein, N.D., Autry, A.E., Marin-Rodriguez, B., Kapoor, V.,  
570 Miyamishi, K., Zweifel, L.S., Luo, L., Uchida, N., *et al.* (2018). Functional circuit architecture  
571 underlying parental behaviour. *Nature* 556, 326-331.
- 572 Korn, H., and Faber, D.S. (2005). The Mauthner cell half a century later: a neurobiological model for  
573 decision-making? *Neuron* 47, 13-28.
- 574 Koyama, M., Kinkhabwala, A., Satou, C., Higashijima, S., and Fetcho, J. (2011). Mapping a sensory-  
575 motor network onto a structural and functional ground plan in the hindbrain. *Proc Natl Acad Sci U S*  
576 *A* 108, 1170-1175.
- 577 Kupfermann, I., and Weiss, K.R. (1978). The command neuron concept. *Behavioural and Brain*  
578 *Sciences* 1, 3-39.
- 579 Li, Y., Zeng, J., Zhang, J., Yue, C., Zhong, W., Liu, Z., Feng, Q., and Luo, M. (2018).  
580 Hypothalamic Circuits for Predation and Evasion. *Neuron* 97, 911-924.e915.
- 581 Lister, J.A., Robertson, C.P., Lepage, T., Johnson, S.L., and Raible, D.W. (1999). nacre encodes a  
582 zebrafish microphthalmia-related protein that regulates neural-crest-derived pigment cell fate.  
583 *Development* 126, 3757-3767.
- 584 Longair, M.H., Baker, D.A., and Armstrong, J.D. (2011). Simple Neurite Tracer: open source  
585 software for reconstruction, visualization and analysis of neuronal processes. *Bioinformatics* 27, 2453-  
586 2454.
- 587 Marquart, G.D., Tabor, K.M., Brown, M., Strykowski, J.L., Varshney, G.K., LaFave, M.C.,  
588 Mueller, T., Burgess, S.M., Higashijima, S., and Burgess, H.A. (2015). A 3D Searchable Database of  
589 Transgenic Zebrafish Gal4 and Cre Lines for Functional Neuroanatomy Studies. *Front Neural*  
590 *Circuits* 9, 78.
- 591 Marquart, G.D., Tabor, K.M., Horstick, E.J., Brown, M., Geoca, A.K., Polys, N.F., Nogare, D.D.,  
592 and Burgess, H.A. (2017). High-precision registration between zebrafish brain atlases using  
593 symmetric diffeomorphic normalization. *Gigascience* 6, 1-15.
- 594 Marques, J.C., Lackner, S., Felix, R., and Orger, M.B. (2018). Structure of the Zebrafish Locomotor  
595 Repertoire Revealed with Unsupervised Behavioral Clustering. *Curr Biol* 28, 181-195.e185.
- 596 Masai, I., Lele, Z., Yamaguchi, M., Komori, A., Nakata, A., Nishiwaki, Y., Wada, H., Tanaka, H.,  
597 Nojima, Y., Hammerschmidt, M., *et al.* (2003). N-cadherin mediates retinal lamination, maintenance  
598 of forebrain compartments and patterning of retinal neurites. *Development* 130, 2479-2494.
- 599 McElligott, M.B., and O'Malley D, M. (2005). Prey tracking by larval zebrafish: axial kinematics and  
600 visual control. *Brain Behav Evol* 66, 177-196.

- 601 Miri, A., Daie, K., Burdine, R.D., Aksay, E., and Tank, D.W. (2011). Regression-based  
602 identification of behavior-encoding neurons during large-scale optical imaging of neural activity at  
603 cellular resolution. *J Neurophysiol* *105*, 964-980.
- 604 Muto, A., Lal, P., Ailani, D., Abe, G., Itoh, M., and Kawakami, K. (2017). Activation of the  
605 hypothalamic feeding centre upon visual prey detection. *Nat Commun* *8*, 15029.
- 606 Park, S.G., Jeong, Y.C., Kim, D.G., Lee, M.H., Shin, A., Park, G., Ryoo, J., Hong, J., Bae, S., Kim,  
607 C.H., *et al.* (2018). Medial preoptic circuit induces hunting-like actions to target objects and prey.  
608 *Nat Neurosci* *21*, 364-372.
- 609 Patterson, B.W., Abraham, A.O., MacIver, M.A., and McLean, D.L. (2013). Visually guided  
610 gradation of prey capture movements in larval zebrafish. *J Exp Biol* *216*, 3071-3083.
- 611 Qian, J., Hastie, T., Friedman, J., Tibshirani, R., and Simon, N. (2013). Glmnet for matlab. available  
612 at: [http://www.stanford.edu/~hastie/glmnet\\_matlab/](http://www.stanford.edu/~hastie/glmnet_matlab/).
- 613 Semmelhack, J.L., Donovan, J.C., Thiele, T.R., Kuehn, E., Laurell, E., and Baier, H. (2014). A  
614 dedicated visual pathway for prey detection in larval zebrafish. *Elife* *3*.
- 615 Sillar, K.T., Picton, L., and Heitler, W.J. (2016). *The neuroethology of predation and escape* (Wiley  
616 Blackwell).
- 617 Trivedi, C.A., and Bollmann, J.H. (2013). Visually driven chaining of elementary swim patterns into  
618 a goal-directed motor sequence: a virtual reality study of zebrafish prey capture. *Front Neural Circuits*  
619 *7*, 86.
- 620 Vladimirov, N., Mu, Y., Kawashima, T., Bennett, D.V., Yang, C.T., Looger, L.L., Keller, P.J.,  
621 Freeman, J., and Ahrens, M.B. (2014). Light-sheet functional imaging in fictively behaving zebrafish.  
622 *Nat Methods* *11*, 883-884.
- 623 von Philipsborn, A.C., Liu, T., Yu, J.Y., Masser, C., Bidaye, S.S., and Dickson, B.J. (2011).  
624 Neuronal control of *Drosophila* courtship song. *Neuron* *69*, 509-522.
- 625 Yanez, J., Suarez, T., Quelle, A., Fogueira, M., and Anadon, R. (2018). Neural connections of the  
626 pretectum in zebrafish (*Danio rerio*). *J Comp Neurol* *526*, 1017-1040.
- 627 Yoshihara, M., and Yoshihara, M. (2018). 'Necessary and sufficient' in biology is not necessarily  
628 necessary - confusions and erroneous conclusions resulting from misapplied logic in the field of  
629 biology, especially neuroscience. *J Neurogenet* *32*, 53-64.
- 630 Zolessi, F.R., Poggi, L., Wilkinson, C.J., Chien, C.B., and Harris, W.A. (2006). Polarization and  
631 orientation of retinal ganglion cells in vivo. *Neural Dev* *1*, 2.
- 632 Zou, H., and Hastie, T. (2005). Regularization and variable selection via the elastic net. *67*, 301-320.  
633

## 634 **Materials and Methods**

### 635 **Experimental model and transgenic lines**

636 Animals were reared on a 14/10 h light/dark cycle at 28.5°C. For all experiments, we used  
637 zebrafish larvae homozygous for the *mitfa<sup>w2</sup>* skin-pigmentation mutation (Lister *et al.*, 1999).  
638 Larvae used for pan-neuronal Ca<sup>2+</sup> imaging experiments were double-transgenic  
639 *Tg(elavl3:H2B-GCaMP6s)<sup>j5Tg</sup>* (Vladimirov *et al.*, 2014) and *Tg(atoh7:gapRFP)<sup>cu2Tg</sup>* (Zolessi *et al.*,  
640 2006). For AF7-pretectal Ca<sup>2+</sup> imaging, larvae were double-transgenic for *Tg(-*  
641 *2.5pvalb6:KalTA4)<sup>u508Tg</sup>* [*i.e.* *Tg(KalTA4u508)*; generated in this study, see below] and either  
642 *Tg(UAS:GCaMP6f,cryaa:mCherry)<sup>icm06Tg</sup>* (Knafo *et al.*, 2017) or *Tg(UAS:jGCaMP7f)<sup>u341Tg</sup>*  
643 (generated in this study, see below). Larvae used to determine whether *KalTA4u508* neurons  
644 reside in AF7-pretectum were triple-transgenic *Tg(KalTA4u508)*, *Tg(UAS-E1b:NfsB-*  
645 *mCherry)<sup>jb17Tg</sup>* (Davison *et al.*, 2007) and *TgBAC(slcl17a6b:loxP-DsRed-loxP-GFP)<sup>nms14Tg</sup>* (Koyama *et*  
646 *al.*, 2011). Larvae used for AF7 dendritic stratification analyses were triple-transgenic  
647 *Tg(KalTA4u508)*, *Tg(UAS:RFP)<sup>tp2Tg</sup>* (Auer *et al.*, 2014), and *Tg(atoh7:GFP)<sup>rw021Tg</sup>* (Masai *et al.*,  
648 2003). Fish used for mapping of cell location in the adult pretectum were triple-transgenic  
649 *Tg(KalTA4u508)*, *Tg(UAS:GCaMP6f,cryaa:mCherry)<sup>icm06Tg</sup>* and *Tg(atoh7:gapRFP)<sup>cu2Tg</sup>*. Larvae used  
650 for photo-activatable GFP labelling were *Tg(Cau.Tuba1:c3paGFP)<sup>a7437Tg</sup>* (Bianco *et al.*, 2012).  
651 Larvae used for single cell labelling and optogenetic stimulation of AF7-pretectal cells were  
652 double-transgenic *Tg(KalTA4u508)* and *Tg(elavl3:H2B-GCaMP6s)<sup>j5Tg</sup>*. Larvae used for pretectal  
653 cell ablations and free-swimming behaviour analyses were triple-transgenic *Tg(KalTA4u508)*,  
654 *Tg(UAS-E1b:NfsB-mCherry)<sup>jb17Tg</sup>* (Davison *et al.*, 2007) and *Tg(elavl3:ITETA-PTET:Cr.Cop4-*  
655 *YFP)<sup>fmi2Tg</sup>* (Fajardo *et al.*, 2013). Larvae used for optogenetic stimulation of the avOT were  
656 double transgenic *Tg(atoh7:gapRFP)<sup>cu2Tg</sup>* and *Tg(elavl3:ITETA-PTET:Cr.Cop4-YFP)<sup>fmi2Tg</sup>* with  
657 either homozygous, heterozygous or no mutation of the *atoh7<sup>th241</sup>* gene (Kay *et al.*, 2001). All  
658 larvae were fed *Paramecia* from 4 dpf onward. Animal handling and experimental procedures  
659 were approved by the UCL Animal Welfare Ethical Review Body and the UK Home Office  
660 under the Animal (Scientific Procedures) Act 1986.

### 661 **2-photon calcium imaging and behavioural tracking**

662 The procedure was very similar to that described in Bianco and Engert (2015). Larval zebrafish  
663 were mounted in 3% low-melting point agarose (Sigma-Aldrich) at 5 dpf or 6 dpf and allowed  
664 to recover overnight before functional imaging at 6 dpf or 7 dpf. Imaging was performed using  
665 a custom-built 2-photon microscope [Olympus XLUMPLFLN 20× 1.0 NA objective, 580 nm  
666 PMT dichroic, bandpass filters: 510/84 (green), 641/75 (red) (Semrock), Coherent Chameleon  
667 II ultrafast laser]. Imaging was performed at 920 nm with average laser power at sample of 5–  
668 10 mW. For imaging of *Tg(elavl3:H2B-GCaMP6s)* larvae, images (500×500 pixels, 0.61 μm/px)  
669 were acquired by frame scanning at 3.6 Hz and for each larva 10–14 focal planes were acquired  
670 with a z-spacing of 8 μm. For imaging of *Tg(KalTA4u508;UAS:GCaMP6f)* or  
671 *Tg(KalTA4u508;UAS:jGCaMP7f)* larvae, the same image size and scanning rate were used but  
672 5–6 focal planes with a z-spacing of 5 μm were acquired for each larva. Visual stimuli were  
673 back-projected (Optoma ML750ST) onto a curved screen placed in front of the animal at a  
674 viewing distance of ~7 mm while a second projector provided constant background  
675 illumination below the fish. A coloured Wratten filter (Kodak, no. 29) was placed in front of

676 both projectors to block green light from the PMT. Visual stimuli were designed in MATLAB  
677 using Psychophysics toolbox (Brainard, 1997). For all experiments, stimuli were presented in  
678 a pseudo-random sequence with 30 s inter-stimulus interval. Stimuli comprised 5° or 16°, dark  
679 or bright spots moving at 30°/s either left→right or right→left across ~200° of frontal visual  
680 space. Bright/dark spots had Weber contrast of 1/-1, respectively.

681 In addition, 3 s whole-field bright/dark flashes were presented. Eye movements were  
682 tracked at 60 Hz under 720 nm illumination using a FL3-U3-13Y3M-C camera (Point Grey)  
683 that imaged through the microscope objective. Tail movements were imaged at 430 Hz under  
684 850 nm illumination using a sub-stage GS3-U3-41C6NIR-C camera (Point Grey). Microscope  
685 control, stimulus presentation and behaviour tracking were implemented using custom  
686 LabVIEW and MATLAB software.

### 687 Calcium imaging analysis

688 All calcium imaging data analysis was performed using custom-written MATLAB scripts.  
689 Motion correction of fluorescence imaging data was performed as per Bianco and Engert  
690 (2015). Regions of interest (ROIs) corresponding to cell nuclei were extracted using the cell  
691 detection code from Kawashima *et al.* (2016). The time-varying fluorescence signal  $F(t)$  for  
692 each cell was extracted by computing the mean value of all pixels within the corresponding  
693 ROI binary mask at each time-point (imaging frame). The proportional change in fluorescence  
694 ( $\Delta F/F_0$ ) at time  $t$  was calculated as

$$695 \quad \Delta F/F_0 = \frac{F(t) - F_0}{F_0}$$

696 where  $F_0$  is a reference fluorescence value, taken as the median of  $F(t)$  during the 30 frames  
697 prior to all visual stimulus presentations.

698 We used multilinear regression to model the fluorescent timeseries of each imaged  
699 neuron (ROI) in terms of simultaneously recorded kinematic predictors (‘regressors’).  
700 Regressors were generated for oculomotor and locomotor variables (7 eye and 3 tail  
701 kinematics, see Supplementary File 1) by convolving time-series vectors for the relevant  
702 kinematic with a calcium impulse response function [CIRF, approximated as the sum of a fast-  
703 rising exponential, tau 20 ms, and a slow-decaying exponential, tau 420 ms for GCaMP6f and  
704 jGCaMP7f or 3 s for H2B-GCaMP6s; (Miri *et al.*, 2011)]. To account for delays between neural  
705 activity and behaviour and/or indicator dynamics, we time-shifted the regressor matrix  
706 relative to the fluorescent response variable so as to minimise the residual squared error of an  
707 ordinary least squares regression model. We used elastic-net regularised regression to  
708 improve interpretability and prediction accuracy in the presence of multicollinearity between  
709 the regressors (Zou and Hastie, 2005). Elastic net models were fit using the ‘glmnet’ package  
710 for MATLAB (Qian *et al.*, 2013) and hyperparameters controlling the ratio of L1 vs. L2 penalty  
711 (alpha) and the degree of regularization (lambda) were selected to minimise ten-fold cross-  
712 validated squared error. Model coefficients were then used to construct visuomotor vectors.

713 Visuomotor vectors (VMVs) were generated for each neuron by concatenating (a) the  
714 integral of  $\Delta F/F_0$  in response to each visual stimulus (12 s time window from stimulus onset,  
715 mean integral across stimulus presentations) for presentations in which no eye convergence  
716 was performed by the larva (components 1–10); (b) multilinear regression coefficients ( $\beta$   
717 values) for eye, tail and motion correction regressors (components 11–21). VMVs from all

718 imaged neurons were assembled into a matrix and each component was normalised across  
719 cells by dividing each column by its standard deviation.

720 VMV clustering was performed using a two-step procedure. First, we performed  
721 hierarchical agglomerative clustering of VMVs using a correlation distance metric (Bianco  
722 and Engert, 2015). For this first step, we selected only neurons that either exhibited strong  
723 visual responses (specifically, the maximum value of components 1–10 had to be within the  
724 top 5<sup>th</sup> percentile of such values across all neurons) or was well modelled in terms of  
725 behavioural kinematics ( $R^2$  had to be within the top 5<sup>th</sup> percentile of cross-validated  $R^2$  across  
726 all neurons). The centroids of clusters generated in this step (correlation threshold, 0.7)  
727 constituted a set of archetypal response profiles. Next, the VMVs of the remaining neurons  
728 were assigned to the cluster with the closest centroid (within a correlation distance threshold  
729 of 0.7).

730 To assign cluster identities to *KalTA4u508* pretectal neurons (e.g. Figure 2J and 3T),  
731 VMVs were generated as described above and the same assignment strategy and correlation  
732 distance threshold (0.7) were used. Note that normalisation of components was performed  
733 using the standard deviations computed for the initial matrix of VMVs.

734 Hunting Index (HIx) scores were calculated for each cell as follows. For each hunting  
735 response, convergence-triggered activity was measured by computing the mean of z-scored  
736 GCaMP fluorescence in a time window ( $\pm 1$  s) centred on the convergent saccade,  $x_{Ri}$ . Next,  
737 activity was measured at the same time during non-response trials in which the same visual  
738 stimulus was presented. The difference between  $x_{Ri}$  and the mean of non-response activity,  
739  $\mu_{NR}$ , was computed:

$$740 \quad d_i = x_{Ri} - \mu_{NR}$$

741 HIx scores were computed as the mean of these  $d_i$  distance values across all response  
742 trials during which the cell was imaged. CMI values were computed separately for  
743 convergence events paired with leftwards tail movements, rightwards tail movements, and  
744 symmetrical/no tail movements.

### 745 3D image registration

746 Registration of image volumes was performed using the ANTs toolbox version 2.1.0 (Avants  
747 *et al.*, 2011). Images were converted to the NRRD file format required by ANTs using ImageJ.  
748 As an example, to register the 3D image volume in 'fish1\_01.nrrd' to the reference brain  
749 'ref.nrrd', the following parameters were used:

```
750 antsRegistration -d 3 -float 1 -o [fish1_, fish1_Warped.nii.gz]  
751 -n BSpline -r [ref.nrrd, fish1_01.nrrd, 1] -t Rigid[0.1] -m  
752 GC[ref.nrrd, fish1_01.nrrd, 1, 32, Regular, 0.25] -c  
753 [200x200x200x0,1e-8, 10] -f 12x8x4x2 -s 4x3x2x1 -t Affine[0.1] -  
754 m GC[ref.nrrd, fish1_01.nrrd, 1, 32, Regular, 0.25] -c  
755 [200x200x200x0,1e-8, 10] -f 12x8x4x2 -s 4x3x2x1 -t SyN[0.1, 6, 0]  
756 -m CC[ref.nrrd, fish1_01.nrrd, 1, 2] -c [200x200x200x200x10,1e-  
757 7, 10] -f 12x8x4x2x1 -s 4x3x2x1x0
```

758 The deformation matrices computed above were then applied to any other image channel N  
759 of fish1 using:

```
760 antsApplyTransforms -d 3 -v 0 -float -n BSpline -i fish1_01.nrrd
761 -r ref.nrrd -o fish1_0N_Warped.nii.gz -t fish1_1Warp.nii.gz -t
762 fish1_0GenericAffine.mat
```

763 All brains were registered onto the ZBB brain atlas (1×1×1 xyz μm/px) (Marquart *et al.*,  
764 2015; Marquart *et al.*, 2017) and onto a high-resolution *Tg(elavl3:H2B-GCaMP6s)* reference  
765 brain (0.76×0.76×1 xyz μm/px, mean of 3 larvae), with some differences between experiments:

766 • For functional calcium imaging volumes, a three-step registration was used: the imaging  
767 volume, composed of 10–14 image planes (500×500 px, 0.61 μm/px, 8 μm z-spacing),  
768 was first registered to a larger volume of the same brain acquired at the end of the  
769 experiment (1 μm z-spacing), using affine and warp transformations. Then, the larger  
770 volume was registered to the Hi-Res *Tg(elavl3:H2B-GCaMP6s)* reference brain. Because  
771 the high-resolution volume had already been registered onto the ZBB atlas, the  
772 transformations were concatenated to bring the functional imaging volume to the ZBB  
773 atlas (calcium imaging stack → post-imaging stack → Hi-Res → ZBB).

774 • The brain regions displayed in Figure 2F,H, and Figure 2–supplement 1A,B correspond  
775 to volumetric binary image masks in the ZBB atlas that have been registered to the Hi-  
776 Res *Tg(elavl3:H2B-GCaMP6s)* reference brain using the ZBB *Tg(elavl3:H2B-RFP)* volume  
777 and performing affine and warp transformations (ZBB *elavl3:H2B-RFP* → Hi-Res).

778 • For the registration displayed in Figure 2A,B of *KalTA4u508* neurons to the Hi-Res  
779 *Tg(elavl3:H2B-GCaMP6s)* reference brain, the imaging volume was registered to the ZBB  
780 *Tg(vglut:DsRed)* volume [previously registered to the Hi-Res reference brain (ZBB  
781 *elavl3:H2B-RFP* → Hi-Res)] using the *vglut2a* channel [*TgBAC(slc17a6b:loxP-DsRed-loxP-*  
782 *GFP)*] acquired in parallel with *Tg(KalTA4u508;UAS-E1b:NfsB-mCherry)* imaging and  
783 performing affine and warp transformations.

784 • For single *KalTA4u508* neuron tracing experiments, the imaging volume was first  
785 registered to the Hi-Res *Tg(elavl3:H2B-GCaMP6s)* reference brain using the H2B-  
786 GCaMP6s channel acquired in parallel with *Tg(KalTA4u508);UAS-CoChR-tdTomato-*  
787 *injected* imaging and performing affine and warp transformations. Transformations  
788 were then concatenated to bring the imaging volume and associated neuron tracing (see  
789 below) to the ZBB atlas (imaging stack → Hi-Res → ZBB).

790 • Imaging volumes related to photo-activation of PA-GFP were registered to a whole-  
791 brain reference from a 6 dpf *Tg(α-tubulin:C3PA-GFP)* larva in which no photo-activation  
792 was performed, using affine and warp transformations. The *Tg(α-tubulin:C3PA-GFP)*  
793 reference volume was then registered to the ZBB atlas. The photo-activation volume  
794 was transported to the Hi-Res *Tg(elavl3:H2B-GCaMP6s)* reference by concatenating the  
795 transformations (photo-activation stack → *Tg(α-tubulin:C3PA-GFP)* reference → ZBB  
796 → Hi-Res).

797 All registration steps were manually assessed for global and local alignment accuracy.  
798 All brain regions referred to in this paper correspond to the volumetric binary image masks  
799 in the ZBB atlas, with the exception of regions in the anterior-ventral optic tectum, AF7-

800 pretectum, and cholinergic nucleus isthmi. These image masks, in ZBB reference space, can  
801 be downloaded as Supplementary File 2–4.

## 802 DNA cloning and transgenesis

803 To generate the *UAS:CoChR-tdTomato* DNA construct used for single cell labelling and  
804 optogenetic stimulations, the coding sequence of the blue light-sensitive opsin CoChR (from  
805 *pAAV-Syn-CoChR-GFP*) and the red fluorescent protein tdTomato (from *pAAV-Syn-Chronos-*  
806 *tdTomato*) were cloned in frame into a UAS Tol1 backbone (*pT1UciMP*). The *pAAV-Syn-*  
807 *CoChR-GFP* and *pAAV-Syn-Chronos-tdTomato* plasmids were gifts from Edward Boyden  
808 (Addgene plasmid # 59070 and # 62726, respectively) (Klapoetke *et al.*, 2014). The *pT1UciMP*  
809 plasmid was a gift from Harold Burgess (Addgene plasmid # 62215) (Horstick *et al.*, 2015).  
810 The cloning was achieved using the In-Fusion HD Cloning Plus CE kit (Clontech) with the  
811 following primers:

- 812 • CoChR\_fw, CTCAGCGTAAAGCCACCATGCTGGGAAACG
- 813 • CoChR\_rev, TACTACCGGTGCCGCCACTGT
- 814 • CoChR\_tdT\_fw, ACAGTGGCGGCACCGGTAGTA
- 815 • tdT\_rev, CTAGTCTCGAGATCTCCATGTTTACTTATACAGCTCATCCATGCC

816 To generate the *UAS:jGCaMP7f* DNA construct used for creating the  
817 *Tg(UAS:jGCaMP7f)<sup>u341Tg</sup>* line, the coding sequence of the genetically encoded calcium indicator  
818 jGCaMP7f (from *pGP-CMV-jGCaMP7f*) was cloned into the *pT1UciMP* UAS Tol1 backbone.  
819 The *pGP-CMV-jGCaMP7f* plasmid was a gift from Douglas Kim (Addgene plasmid # 104483)  
820 (Dana *et al.*, 2018). As above, the cloning was achieved using the In-Fusion HD Cloning Plus  
821 CE kit (Clontech) with the following primers:

- 822 • UAS\_jGCaMP7\_fw, CGTAAAGCCACCATGGGTTCTCATC
- 823 • UAS\_jGCaMP7\_rev, CTCGAGATCTCCATGTTTACTTCGCTGTCATCATTTGTACAAAC

824 To generate the *Tg(UAS:jGCaMP7f)* line, purified *UAS:jGCaMP7f* DNA constructs  
825 (35 ng/ $\mu$ l) were co-injected with Tol1 transposase mRNA (80 ng/ $\mu$ l) into *Tg(KalTA4u508)*  
826 zebrafish embryos at the early one-cell stage. Transient expression, visible as jGCaMP7f  
827 fluorescence, was used to select injected embryos that were then raised to adulthood. *Tol1*  
828 transposase mRNA was prepared by *in vitro* transcription from NotI-linearised *pCS2-Tol1.zf1*  
829 plasmid using the SP6 transcription mMessage mMachine kit (Life Technologies). The *pCS2-*  
830 *Tol1.zf1* was a gift from Harold Burgess (Addgene plasmid # 61388) (Horstick *et al.*, 2015).  
831 RNA was purified using the RNeasy MinElute Cleanup kit (Qiagen). Germ line transmission  
832 was identified by mating sexually mature adult fish to *mitfa* fish and, subsequently, examining  
833 their progeny for jGCaMP7f fluorescence. Positive embryos from a single fish were then raised  
834 to adulthood. Once this second generation of fish reached adulthood, positive embryos from  
835 a single `founder` fish were again selected and raised to adulthood to establish a stable  
836 *Tg(KalTA4u508;UAS:jGCaMP7f)* double transgenic line.

837 The *Tg(-2.5pvalb6:KalTA4)<sup>u508Tg</sup>* [*i.e.* *Tg(KalTA4u508)*] line was isolated as follows. First,  
838 we used Gateway cloning (Invitrogen) to construct an expression vector in which ~2.5 kb of  
839 zebrafish genomic sequence upstream of the *pvalb6* gene start codon was placed upstream of  
840 the KalTA4 (Distel *et al.*, 2009) open reading frame. The genomic sequence was cloned using  
841 the following primers and Phusion PCR polymerase (Thermo Fisher Scientific):

- 842 • fwd: GGGGACAAGTTTGTACAAAAAAGCAGGCTggatggtgggccaatcaaaggctac  
843 • rev: GGGGACCACTTTGTACAAGAAAGCTGGGTggaacgagaccggcaacacacag

844 (where capital letters indicate the attB1/B2 extension sequences).

845 The expression vector was then micro-injected into one-cell stage *Tg(UAS-E1b:Kaede)<sup>1999t</sup>*  
846 (Davison *et al.*, 2007) embryos at 30 ng/ $\mu$ l along with *tol2* mRNA (30 ng/ $\mu$ l) and adult fish  
847 were screened for germline transmission by outcrossing as described above. This expression  
848 vector generated a wide range of expression patterns, one of which labelled AF7-pretectal  
849 neurons as reported here (allele *u508Tg*).

## 850 Immunohistochemistry

### 851 Larvae

852 Samples were fixed overnight in 4% paraformaldehyde (PFA) in 0.1 M phosphate buffered  
853 saline (PBS, Sigma-Aldrich) and 4% sucrose (Sigma-Aldrich) at 4°C. Brains were manually  
854 dissected with forceps prior to immunostaining. First, dissected brains were permeabilised by  
855 incubation in proteinase-K (40  $\mu$ g/ml) in PBS with 1% Triton-X100 (PBT, Sigma-Aldrich) for  
856 15 minutes. This was followed by 3  $\times$  5 min washes in PBT, 20 min fixation in 4% PFA at room  
857 temperature and 3  $\times$  5 min washes in PBT. Second, brains were incubated in block solution  
858 (2% goat serum, 1% DMSO, 1% BSA in PBT, Sigma-Aldrich) for 2 h. Subsequently, brains were  
859 incubated in block solution containing primary antibodies overnight, followed by 6  $\times$  1 h  
860 washes in PBT on a slowly rotating shaker. Third, brains were incubated in block solution  
861 containing secondary antibodies overnight, followed by 6  $\times$  1 h washes in PBT. Finally, PBT  
862 was rinsed out by doing washes in PBS and brains were stored at 4°C. Imaging was performed  
863 using the two-photon microscope described above at 790 nm. Primary antibodies were: rabbit  
864 anti-GFP (AMS Biotechnology, TP401, dilution 1:1000) and mouse anti-ERK (Cell Signaling  
865 Technology, 9102, p44/42 MAPK (Erk1/2), dilution 1:500). Secondary antibodies were: goat  
866 anti-rabbit Alexa Fluor 488-conjugated (Thermo Fisher Scientific, A-11034, dilution 1:200), and  
867 goat anti-mouse Alexa Fluor 594-conjugated (Thermo Fisher Scientific, A-11005, dilution  
868 1:200).

### 869 Adults

870 *Tg(KalTA4u508;UAS:GCaMP6f;atoh7:gapRFP)* fish (3 months old) were deeply anesthetized in  
871 0.2% tricaine (MS222, Sigma) and fixed in 4% paraformaldehyde (PFA) for 24 h at 4°C. Brains  
872 were then carefully dissected under a stereomicroscope and transferred to saline phosphate  
873 buffer (PBS), where they were maintained for at least half an hour. Two different procedures  
874 were used for sectioning the brains. For cryostat sectioning, brains were cryopreserved,  
875 embedded in Tissue Tek OCT compound (Sakura Finetek) and frozen using liquid nitrogen  
876 cooled methylbutane. Transverse sections of the brain (12  $\mu$ m thick) were obtained using a  
877 cryostat and collected in gelatine-coated slides. For vibratome sectioning, brains were first  
878 embedded into 3% agarose in PBS. Transverse sections of the brains (100  $\mu$ m thick) were  
879 obtained using a vibratome and transferred to PBS in microtubes. Immunostaining was  
880 performed by either adding solutions onto the cryostat sections or changing the solutions  
881 inside the microtubes. Sections were incubated first in normal goat serum (Sigma, dilution  
882 1:10) in PBS with 0.5% Triton for 1 h at room temperature, and then with a cocktail of two  
883 primary antibodies (rat anti-GFP, Nacalai Tesque, 04404-26, dilution 1:1000, and rabbit anti-  
884 RFP, MBL International, PM005, dilution 1:1000) for 24 h at room temperature. Next, after  
885 three washes in PBS, brain sections were incubated with a cocktail of two secondary



886 antibodies (goat anti-rat Alexa 488, Thermo Fisher Scientific, A-11006, dilution 1:500, and goat  
887 anti-rabbit Alexa 568, Thermo Fisher Scientific, A-11011, dilution 1:500) for 1 h at room  
888 temperature. Sections were washed in PBS, mounted with 50% glycerol in PBS and imaged  
889 using a Nikon A1R confocal microscope equipped with a Nikon Plan Fluor 20× 0.50 NA  
890 objective. Excitation light was provided by an argon ion multichannel laser tuned to 488 nm  
891 (green channel), and a 561 nm diode laser (red channel).

## 892 **Single cell labelling**

893 To label individual *KalTA4u508* neurons, *UAS:CoChR-tdTomato* DNA constructs were injected  
894 into 1–4 cell stage *Tg(KalTA4u508)* embryos. Plasmid DNA was purified using midi-prep kits  
895 (Qiagen) and injected at a concentration of 30 ng/μl in distilled water. Larvae (4 dpf) were  
896 then screened for CoChR-tdTomato expression. Only larvae showing expression in a single  
897 *KalTA4u508* pretectal neuron were subsequently used for optogenetic stimulations and  
898 neuronal tracing experiments. Single cell morphologies were traced using the Simple Neurite  
899 Tracer plugin for ImageJ (Longair *et al.*, 2011).

## 900 **Anatomical analyses**

901 Cell density of neurons belonging to hunting-initiation clusters (25–28) was computed in the  
902 following way. First, we obtained the soma 3D coordinates of all cluster 25–28 neurons  
903 following anatomical registration to the high-resolution *Tg(elavl3:H2B-GCaMP6s)* reference  
904 brain. Then, we computed the local cell density at each soma location using an adaptive  
905 Gaussian-based kernel density estimate (Breiman *et al.*, 1977), with the bandwidth at each  
906 point constrained to be proportional to the *k*th nearest neighbour distance where:

$$907 \quad k = \sqrt{n}$$

908 and *n* is the number of neurons (*n* = 6,630 cells from 8 fish). To compute the kernel density  
909 estimate, we used a MATLAB-based toolbox developed by Alexander Ihler  
910 ([www.ics.uci.edu/~ihler/code/kde.html](http://www.ics.uci.edu/~ihler/code/kde.html)). Images in Figure 2A–C represent volume  
911 projections in which hunting-initiation neurons are colour-coded according to local cell  
912 density.

913 Neurite stratification and axon projection profiles in Figure 2D,G were obtained by  
914 measuring fluorescence intensity values along the axes indicated on figure panels using  
915 ImageJ `Line` and `Plot Profile` tools. For each image channel, a maximum intensity projection  
916 image was generated before measuring fluorescence intensity. Each intensity profile *i* was  
917 then rescaled to generate a profile, *I*, ranging from 0 to 1 as follows:

$$918 \quad I = \frac{i - i_{min}}{i_{max} - i_{min}}$$

919 where *i<sub>min</sub>* and *i<sub>max</sub>* are the minimum and maximum values of profile *i*, respectively.

## 920 **Photo-activation of PA-GFP**

921 Larvae (5 dpf) homozygous for the *Tg(α-tubulin:C3PA-GFP)* transgene were anaesthetised and  
922 mounted in 2% low-melting temperature agarose. The same custom-built 2-photon  
923 microscope used for functional imaging was used to photo-activate PA-GFP in a small region  
924 (9×9 μm) containing cell bodies located in AF7-pretectum. The photo-activation site was

925 selected by imaging the brain at 920 nm. Photo-activation was performed by continuously  
926 scanning at 790 nm (5 mW at sample) for 4 min. Larvae were then unmounted and allowed to  
927 recover. At 7 dpf, an image stack (1200×800 px, 0.38  $\mu\text{m}/\text{px}$ ,  $\sim 200 \mu\text{m}$  z-extent) was acquired  
928 at 920 nm covering a large portion of the midbrain, tectum and hindbrain. Axonal  
929 projections were traced using the Simple Neurite Tracer plugin for ImageJ (Longair *et al.*,  
930 2011).

### 931 **Monitoring of free-swimming behaviour**

932 The same behavioural tracking system was used for both optogenetic stimulations and  
933 assessment of visuomotor behaviours with some differences. Images were acquired under  
934 850 nm illumination using a high-speed camera [Mikrotron, EoSens CL MC1362, 250 Hz  
935 (*optogenetic stimulations*) or 700 Hz (*visuomotor behaviours assessment*), 500  $\mu\text{s}$  shutter-time)  
936 equipped with a machine vision lens (Fujinon HF35SA-1) and an 850 nm bandpass filter to  
937 block visible light. In all experiments, larvae were placed in the arena and allowed to acclimate  
938 for around 2 min before starting experiments.

#### 939 Optogenetic stimulations

940 Larvae were placed in a petri dish with a custom-made agarose well (28 mm diameter, 3 mm  
941 depth) filled with fish facility water. Blue light was delivered across the whole arena from  
942 above using a 470 nm LED (OSRAM Golden Dragon Plus, LB W5AM). `LED-On` trials  
943 included 7 s periods of continuous blue light illumination ( $0.443 \pm 0.001 \text{ mW}/\text{mm}^2$ ,  
944 mean  $\pm$  SD), interleaved with `no-stimulation` trials in which no blue light was provided. Both  
945 `LED-On` and `no-stimulation` trials lasted 8 s. A minimum of 10 `LED-On` trials were  
946 acquired for each fish. LED stimulus presentation and camera control were implemented  
947 using custom software written in LabVIEW (National Instruments).

#### 948 Assessment of visuomotor behaviours

949 Larvae were placed in a 35 mm petri dish filled with 3.5 ml of fish facility water. Visual stimuli  
950 were projected onto the arena from below using an AAXA P2 Jr Pico Projector via a cold  
951 mirror. Visual stimuli were designed using Psychophysics Toolbox (Brainard, 1997). Looming  
952 stimuli expanded from 10–100° with L/V ratio of 255 ms (Dunn *et al.*, 2016). Optomotor  
953 gratings had a period of  $\sim 10 \text{ mm}$  and moved at 1 cycle/s. Optomotor gratings and looming  
954 spots were presented in egocentric coordinates such that directional gratings always moved  
955 90° to left or right sides with respect to fish orientation and looming spots were centred 5 mm  
956 away from the body centroid and at 90° to left or right. Stimuli were presented in pseudo-  
957 random order with an inter-stimulus interval of minimum 60 s. Stimuli were only presented  
958 if the body centroid was within a predefined central region (11 mm from the edge of the  
959 arena). If this was not the case, a concentric grating was presented that moved towards the  
960 centre of the arena to attract the fish to the central region. At the beginning of each experiment,  
961 60 *Paramecia* were added to arena. Each experiment typically lasted  $\sim 1$  hour. Final *Paramecia*  
962 numbers were counted manually from full-frame video data from the final 10 s of each  
963 experiment and adjusted for consumption in 60 min [multiplying by 60/experiment duration  
964 (min)]. During experiments, eye and tail kinematics were tracked online as described below.  
965 Camera control, online tracking and stimulus presentation were implemented using custom  
966 software written in LabVIEW (National Instruments) and MATLAB (MathWorks).

## 967 **Analyses of free-swimming behaviour**

968 Data analysis was performed using custom software written in LabVIEW (National  
969 Instruments) and MATLAB (MathWorks). Eye and tail kinematics were tracked offline for  
970 optogenetic experiments, and online for assessment of visuomotor behaviours with some  
971 differences. First, images were background-subtracted using a background model generated  
972 over 8 s in which the larva was moving (*offline tracking*), or a continuously updated  
973 background model (*online tracking*). Next, images were thresholded and the body centroid  
974 was found by running a particle detection routine for binary objects within suitable area  
975 limits. For online tracking, eye centroids were detected using a second threshold and particle  
976 detection procedure with the requirement that these centroids were in close proximity to the  
977 body centroid. For offline tracking, eye centroids were detected using a particle detection  
978 procedure that uses both binary and greyscale images to identify the two centroids within  
979 suitable area limits that had the lowest mean intensity values. For online tracking, body and  
980 eye orientations were computed using second- and third-order image moments. For offline  
981 tracking, body orientation was computed as the angle of the vector formed by the centre of  
982 mass of the body centroid (origin) and the midpoint between the eye centroids. Eye  
983 orientation was computed as the angle between the major axis of the eye and the body  
984 orientation vector. Vergence angle was computed as the difference between the left and right  
985 eye angles. The tail was tracked by performing consecutive annular line-scans, starting from  
986 the body centroid and progressing towards the tip of the tail so as to define 9 equidistant x-y  
987 coordinates along the tail. Inter-segment angles were computed between the 8 resulting  
988 segments. Reported tail curvature was computed as the sum of these inter-segment angles.  
989 Rightward bending of the tail is represented by positive angles and leftward bending by  
990 negative angles. To identify periods of high ocular vergence, which represent hunting  
991 routines, a vergence angle threshold was computed for each fish by fitting a two-term  
992 Gaussian model to its vergence angle distribution. A fish was considered to be hunting if  
993 vergence angle exceeded this vergence threshold. For experiments assessing visuomotor  
994 behaviours, the vergence angle distribution was invariably bimodal and the vergence  
995 threshold was computed as one standard deviation below the centre of the higher angle  
996 Gaussian. For optogenetic experiments, in cases where the vergence angle distribution was  
997 not bimodal, a fixed vergence threshold of  $55^\circ$  was used.

### 998 *Optogenetic experiments*

999 Response probability was computed as the fraction of LED-On trials in which at least one  
1000 hunting routine (*i.e.* period with ocular vergence above threshold) was detected during the  
1001 7 s stimulation period. Similarly, for no-stimulation trials, response probability is the fraction  
1002 of trials in which at least one hunting-like routine was detected. Response latency for LED-  
1003 On trials was calculated from light stimulus onset. Swim bouts were identified using velocity  
1004 thresholds ( $800^\circ/\text{s}$  for bout onset,  $200^\circ/\text{s}$  for bout offset) applied to smoothed absolute tail  
1005 angular velocity traces. Tail beat frequency was computed as the reciprocal of the mean full-  
1006 cycle period during a swim bout. Tail vigour is computed by integrating absolute tail angular  
1007 velocity (smoothed with a 40 ms box-car filter) over the first 120 ms of a swim bout. Bout  
1008 asymmetry measures the degree to which tail curvature during a bout shows the same  
1009 laterality as that determined during the first half-beat. It is computed as the fraction of time  
1010 points in which the sign of tail angle matches the direction of the first half beat. This metric is

1011 high for hunting related J-turns but close to zero for forward swims. For each bout, the fraction  
1012 of total curvature localised to the distal third of the tail was computed for the first half beat.

### 1013 Assessment of visuomotor behaviours

1014 Escape responses to loom stimuli were identified if the instantaneous speed of the body  
1015 centroid exceeded 75 mm/s. An optomotor response gradient [OMR turn rate ( $^{\circ}$ /s)] was  
1016 calculated for each presentation as the total change in orientation during the stimulus  
1017 presentation divided by the duration of the presentation [for leftwards OMR stimuli, the OMR  
1018 turn rate (typically negative) was multiplied by  $-1$  to group the data with rightwards OMR  
1019 stimuli]. Mean swim speed was calculated as the total distance covered by the larva in the  
1020 central region of the arena divided by the total time spent in this region.

### 1021 **Laser ablations**

1022 *KalTA4u508* pretectal neurons were targeted for ablation in 6 dpf  
1023 *Tg(KalTA4u508;UAS:mCherry;elavl3:itTA;Ptet:Chr2-YFP)* larvae, which were anaesthetized  
1024 using MS222 and mounted in 1% low-melting temperature agarose (Sigma-Aldrich).  
1025 Ablations were performed using a MicroPoint system (Andor) attached to a Zeiss Axioplan-2  
1026 microscope equipped with a Zeiss Achroplan water-immersion 63 $\times$  0.95 NA objective. A  
1027 pulsed nitrogen-pumped tunable dye laser (Coumarin-440 dye cell) was focused onto  
1028 individual *KalTA4u508* neurons and pulses were delivered at a frequency of 10 Hz for 60–  
1029 120 s. All visible *KalTA4u508* neurons in both hemispheres were targeted for ablation and cell  
1030 damage was confirmed under DIC optics. Larvae were then unmounted and allowed to  
1031 recover overnight. Control larvae were mounted in 1% low-melting temperature agarose and  
1032 underwent the same manipulations as ablated larvae except for laser-ablation. Pre- and post-  
1033 ablation image stacks were acquired with a 2-photon microscope at 800 nm (800 $\times$ 800 px,  
1034 0.38  $\mu$ m/px,  $\sim$ 40  $\mu$ m z-extent). Cell counting before and after ablations was performed  
1035 manually in ImageJ using the multi-point tool.

### 1036 **Quantification and Statistical Analysis**

1037 Statistical analyses were performed in Prism 8 (GraphPad) and MATLAB R2017b  
1038 (MathWorks). Statistical tests, p-values, N-values, and additional information are reported in  
1039 Supplementary File 1. All tests were two-tailed and were chosen after data were tested for  
1040 normality and homoscedasticity.

1041 **Figure legends**

1042 **Figure 1. AF7-pretectal neurons are recruited at onset of hunting behaviour**

1043 **A** 2-photon GCaMP imaging combined with behavioural tracking during virtual hunting  
1044 behaviour (see Materials and Methods).

1045 **B** Schematic of visual stimuli.

1046 **C** *elavl3:H2B-GCaMP6s;atoh7:gapRFP* reference brain showing imaging volume (green),  
1047 which encompassed most retinal arborisation fields (AF2–10). RFP has been pseudo-  
1048 coloured to demarcate specific AFs on the right hemisphere.

1049 **C'** Example of neuronal activity ( $\Delta F/F_0$ ) within one focal plane in response to a dark,  
1050 leftwards moving prey-like spot (mean activity over 8 presentations) overlaid onto  
1051 anatomical image (grey).

1052 **D** Example of behavioural tracking data indicating hunting initiation (eye convergence and  
1053 leftwards J-turn) in response to a dark, leftwards moving prey-like spot. Asterisk indicates  
1054 time of convergent saccade. cw, clockwise; ccw, counter-clockwise.

1055 **E** Distribution of spot locations at time of convergent saccade. Ticks indicates median  
1056 location for leftwards (blue,  $-18.13^\circ$ ,  $n = 162$  events in 8 fish) and rightwards (red,  $22.10^\circ$ ,  
1057  $n = 122$  events) moving spots.

1058 **F** Hunting response probability (mean + SEM,  $N = 8$  fish) across visual stimuli.

1059 **G** Schematic of the visuomotor vector (VMV) generated for each neuron (see Supplementary  
1060 File 1 and Materials and Methods for detailed description).

1061 **H** VMVs of all clustered neurons ( $n = 93,055$  neurons from 8 fish). White lines indicate  
1062 cluster boundaries. For each cluster, neurons are ordered according to decreasing correlation  
1063 with the cluster mean. Coloured lines on the left along the y-axis indicate hunting-related  
1064 clusters with anatomical maps and  $\Delta F/F_0$  responses shown in 1L–1O (prey-responsive  
1065 clusters in blue, hunting-initiation clusters in red).

1066 **I** VMVs of selected clusters (1, 4, 25–28). Number of cells in each shown on right.

1067 **J** Stimulus-aligned activity during non-response (top) and response (bottom) trials for  
1068 neurons in selected clusters (indicated top).

1069 **K** Hunting Index (HIx) for selected clusters. Left shows schematic indicating how HIx is  
1070 computed and right shows distribution of HIx scores for selected clusters.

1071 **L** Anatomical maps of prey-responsive clusters (left) and hunting-initiation clusters (middle  
1072 and right). Images show dorsal views of intensity sum projections of all neuronal masks in  
1073 each cluster after registration to the *elavl3:H2B-GCaMP6s* reference brain (grey). Insets show  
1074 fraction of neurons in left and right AF7-pretectum or medial thalamus belonging to  
1075 specified clusters.

1076 **M** Vento-dorsal cross-section views of anatomical maps.

1077 **N** Visual stimulus-aligned activity during non-response trials for prey-responsive clusters  
1078 (left) and hunting-initiation clusters (middle and right; mean  $\pm$  SEM). Traces are colour-  
1079 coded according to anatomical laterality (blue, left; red, right). Insets show single-trial  
1080 responses for a single example cell from each cluster (mean as thick line).

1081 **O** Eye convergence-aligned activity for convergences associated with leftwards (top),  
1082 rightwards (bottom), or symmetrical/no tail movements (middle). Activity during both  
1083 spontaneous and visually evoked convergences was used.

1084 Scale bars, 100  $\mu\text{m}$ . A, anterior; D, dorsal; L, leftwards; P, posterior; R, rightwards; V,  
1085 ventral; Sym, symmetric.

1086 See also Figure 1–supplement 1–3, and Video 1.

1087 **Figure 1–supplement 1. Cluster centroids and distributions**

1088 **A** Cluster centroids (mean VMVs) for all 36 clusters.

1089 **B** Distributions of VMV components for all clusters. Distributions across all clustered  
1090 neurons are overlaid in grey. Y-axis ranges from 0 to 0.4 (fraction), x-axis ranges from –2 to 6  
1091 (SD).

1092 **Figure 1–supplement 2. Calcium responses and anatomical distributions of clusters**

1093 **A** Visual stimulus-aligned (left four columns) and eye convergence-aligned (right four  
1094 columns)  $\Delta F/F_0$  responses for all 36 clusters. Responses are shown for small moving spots  
1095 (dark/bright moving leftwards/rightwards, as indicated at top of columns). Traces show  
1096 mean  $\pm$  95% confidence intervals across all neurons in each cluster. Dashed vertical lines  
1097 indicate start/end of stimulus presentation in non-response trials (left four columns), or  
1098 time of eye convergence (right four columns). L, leftwards; R, rightwards. X-axis reports  
1099 time (s).

1100 **B** Anatomical location of clusters (N = 8 larvae). The fraction of cells in each cluster falling  
1101 within each ZBB anatomical region is shown. Red box highlights AF7-pretectum. Y-axis  
1102 ranges from 0 to 0.4 (fraction).

1103 **C** Fraction of imaged cells within each anatomical region that were assigned to each cluster  
1104 type. Red box highlights AF7-pretectum. Y-axis ranges from 0 to 0.15 (fraction of imaged  
1105 neurons in brain region).

1106 **D** Fraction of neurons in each cluster located in the left of right brain hemisphere. Y-axis  
1107 ranges from 0 to 1 (fraction).

1108 **Figure 1– supplement 3. Anatomical maps of clusters**

1109 Images show dorsal views of intensity sum projections of all neuronal masks in each cluster  
1110 (magenta) after registration to the *elavl3:H2B-GCaMP6s* reference brain (grey). Projections  
1111 (obtained through all focal planes,  $\sim$ 100  $\mu$ m total depth) are overlaid on a maximum-  
1112 intensity projection image (gray) from the *elavl3:H2B-GCaMP6s* reference brain (5 planes,  
1113 5  $\mu$ m depth, from focal planes with the largest number of neurons in each cluster).  
1114 Scale bar, 100  $\mu$ m. A, anterior; L, left; P, posterior; R, right.

1115 **Video 1. Z-stack of transgenic line used for calcium imaging with annotated RGC**  
1116 **arborisation fields**

1117 Imaging volume (z-stack) of 6 dpf *elavl3:H2B-GCaMP6s;atoh7:gapRFP* brain (mean of N = 3  
1118 fish) with labelled RGC arborisation fields (AFs). The green channel shows the *elavl3:H2B-*  
1119 *GCaMP6s* reference brain used for anatomical registration.

1120 **Figure 2. Pretectal neurons labelled by *KalTA4u508* are active during hunting initiation**

1121 **A** Dorsal view of *KalTA4u508;UAS:mCherry* expression at 6 dpf (green) registered to the  
1122 *elavl3:H2B-GCaMP6s* reference brain (grey). Neurons of all four hunting-initiation clusters  
1123 combined are shown in purple, colour-coded according to local cell density (clusters 25–28,  
1124 n = 6,630 cells from 8 fish). AF7-pretectum is indicated in yellow and the region is enlarged  
1125 in A'.

1126 **B** Ventro-dorsal cross-section of data in A.

1127 **C** Left AF7-pretectum in a 6 dpf *KalTA4u508;UAS:RFP;atoh7:GFP* larva (dorsal view,  
1128 maximum-intensity projections, 10 planes, 10  $\mu$ m depth).

1129 **D** Dendritic stratification of *KalTA4u508* neurons (green) relative to RGC axons (magenta) in  
1130 AF7. Y-axis indicates distance from the skin in  $\mu\text{m}$  (dashed white arrow in C). Mean and  
1131 individual stratification patterns are reported (N = 4 fish).

1132 **E** *KalTA4u508* neurons in pretectum of a 3 month-old  
1133 *KalTA4u508;UAS:GCaMP6f;atoh7:gapRFP* fish. Pretectal and tectal regions in the left  
1134 hemisphere are shown. Schematic indicates location of micrograph and pretectal nuclei  
1135 (transverse plane). Number of *KalTA4u508* cells in each pretectal nucleus are reported in E'  
1136 (N = 4 fish). APN, accessory pretectal nucleus; CC, cerebellar corpus; *cpop*, postoptic  
1137 commissure; Hb, habenula; HL, hypothalamic lobe; OT, optic tectum; *ot*, optic tract; PCe,  
1138 central pretectal nucleus; PO, posterior pretectal nucleus; PSm, magnocellular superficial  
1139 pretectal nucleus, PSp, parvocellular superficial pretectal nucleus; Tel, telencephalon.

1140 **F** Tracings of individually labelled *KalTA4u508* projection neurons that innervate the  
1141 ipsilateral tectum ('ipsi-projecting' cells, n = 4) in 6–7 dpf *KalTA4u508;UAS:CoChR-*  
1142 *tdTomato;elavl3:H2B-GCaMP6s* larvae registered to the *elavl3:H2B-GCaMP6s* reference brain  
1143 (grey). Selected anatomical regions from the ZBB brain atlas are overlaid. To enable  
1144 morphological comparisons, all traced neurons are shown in the left hemisphere.

1145 **G** Fluorescence profiles of neurites of ipsi-projecting *KalTA4u508* cells along the rostro-  
1146 caudal (R-C, left) and ventral-dorsal (V-D, right) axes of the optic tectum (dashed red arrows  
1147 in F). Mean and individual profiles are reported (n = 4 cells).

1148 **H** Tracings of *KalTA4u508* projection neurons innervating the contralateral hindbrain  
1149 ('contra-projecting' cells, n = 5). Dendritic arbours adjacent to AF7 are enlarged in inset H'.  
1150 nMLF, nucleus of the medial longitudinal fasciculus; RS, reticulospinal system.

1151 **I** Soma location of ipsi- and contra-projecting *KalTA4u508* cells in AF7-pretectum.

1152 **J** VMVs of *KalTA4u508* neurons with assigned cluster identities (n = 188 neurons from  
1153 30 fish). Cell location (blue for left hemisphere, red for right) is reported by the 'Brain side'  
1154 column.

1155 **K** Fraction of assigned *KalTA4u508* neurons in each cluster.

1156 **L** Hunting Index (HIx) scores for *KalTA4u508* neurons in different clusters (mean + SD).

1157 **M** Visual stimulus-aligned responses of *KalTA4u508* neurons during non-response trials  
1158 (mean  $\pm$  SEM). Traces are colour-coded according to anatomical laterality (blue for left  
1159 hemisphere, red for right).

1160 **N** Eye convergence-aligned neuronal responses. Activity during both spontaneous and  
1161 visually evoked convergences was used.

1162 Scale bars, 100  $\mu\text{m}$ , except A', H', I, 50  $\mu\text{m}$ , and C, 20  $\mu\text{m}$ . A, anterior; C, caudal; D, dorsal;  
1163 L, left; P, posterior; R, right (rostral in G); V, ventral; Sym, symmetric; Stim, stimulus.

1164 See also Figure 2–supplement 1.

## 1165 **Figure 2–supplement 1. *KalTA4u508* neurons innervating cerebellum, and PA-GFP** 1166 **projection mapping from AF7-pretectum**

1167 **A** Tracings *KalTA4u508* neurons projecting to ipsilateral medial corpus cerebellum  
1168 (n = 2 cells from 2 fish). The bottom image shows tracings overlaid with selected anatomical  
1169 regions from the ZBB brain atlas.

1170 **B** Tracings of PA-GFP-labelled AF7-pretectal cells projecting to oculomotor nuclei and  
1171 contralateral hindbrain in 7 dpf  *$\alpha$ -tubulin:C3PA-GFP* larvae (N = 4 fish) registered to the  
1172 *elavl3:H2B-GCaMP6s* reference brain (grey). The photo-activation site is indicated in  
1173 magenta.

1174 C PA-GFP-labelled AF7-pretectal cells in a 7 dpf  $\alpha$ -tubulin:C3PA-GFP larva. The photo-  
1175 activation site is indicated in magenta. Anterogradely labelled axonal terminals are visible in  
1176 the ipsilateral medial cerebellum (bottom image, z-plane location is relative to top z-plane).  
1177 D A second example of photoactivation that retrogradely labelled cell bodies in the  
1178 ipsilateral anterior-ventral optic tectum.  
1179 E Distributions of maximum responses across visual stimuli for all recorded neurons in 6–7  
1180 dpf *elavl3:H2B-GCaMP6s* larvae (grey, n = 181,123 cells from 8 fish) and  
1181 *KalTA4u508;UAS:GCaMP6f*, or *KalTA4u508;UAS:jGCaMP7f* larvae (magenta, n = 369 cells  
1182 from 30 fish). Before determining the maximum responses for each neuron, mean integrated  
1183  $\Delta F/F_0$  for each visual stimulus was normalised by dividing values by the corresponding  
1184 standard deviation (SD) across all neurons from *elavl3:H2B-GCaMP6s* larvae.  
1185 Scale bars, 100  $\mu$ m. A, anterior; c., contralateral; i., ipsilateral; L, left; P, posterior; R, right.

1186 **Figure 3. Optogenetic stimulation of single *KalTA4u508* pretectal neurons induces**  
1187 **hunting**

1188 A Optogenetic stimulation of single neurons paired with behavioural tracking.  
1189 B A single *KalTA4u508* neuron in a 7 dpf *KalTA4u508;elavl3:H2B-GCaMP6s* larva that was  
1190 injected at the one-cell stage with *UAS:CoChR-tdTomato* DNA. This ‘contra-projecting’  
1191 neuron is ‘Cell 3’ in Figure 2H. A, anterior; L, left; P, posterior; R, right. Scale bar, 100  $\mu$ m.  
1192 C Example frames from an optogenetically induced hunting event. Labels indicate time  
1193 relative to saccadic eye convergence, which marks hunting initiation (t = 0 ms).  
1194 D Behavioural tracking of tail angle (grey) and ocular vergence angle (red) during an  
1195 optogenetically induced hunting event (ipsi-projecting cell located in the left AF7-pretectum,  
1196 this neuron is ‘Cell 4’ in Figure 2F; see also Video 2). Asterisk indicates time of convergent  
1197 saccade.  
1198 E Larval location colour-coded by vergence angle during the example hunting event in D  
1199 (see also Video 2).  
1200 F Hunting response probability in LED-On versus non-stimulation trials for larvae that  
1201 performed at least one eye convergence during optogenetic stimulation (N = 23 fish).  
1202 G Morphological identity of *KalTA4u508* neurons that elicited hunting upon optogenetic  
1203 stimulation. Numbers of responsive larvae are reported at the bottom (N = 23 fish).  
1204 H Hunting response probability upon optogenetic stimulation of ipsi-projecting (orange,  
1205 n = 9 cells) and contra-projecting neurons (magenta, n = 14 cells).  
1206 I–P Comparison of behavioural kinematics between optogenetically induced hunting events  
1207 (blue, N = 23 fish) and *Paramecia* hunting (dark grey, N = 31 fish). Tail kinematics for non-  
1208 hunting swim bouts were recorded from larvae that were monitored during *Paramecia*  
1209 hunting (light grey). In L–P, data from all bouts are plotted, whereas in I–K the median,  
1210 mean or maximum for each larva is reported.  
1211 Q–S Behavioural kinematics of hunting events induced by stimulation of ipsi-projecting  
1212 *KalTA4u508* neurons (orange, n = 9 cells) or contra-projecting neurons (magenta,  
1213 n = 14 cells).  
1214 T VMVs and cluster identity of *KalTA4u508* neurons that induced hunting upon optogenetic  
1215 stimulation and subsequently underwent calcium imaging (n = 6 cells from 6 larvae).  
1216 Symbols on the left indicate projection cell class and left/right location, and Hlx scores are  
1217 shown on right.  
1218 See also Figure 3–supplement 1 and Video 2.



1219 **Figure 3—supplement 1. Behavioural kinematics of optogenetically induced hunting**

1220 A–F Behavioural kinematics for hunting events evoked by optogenetic stimulation of single  
1221 ipsi-projecting (orange, n = 9 cells) and contra-projecting *KalTA4u508* neurons (magenta,  
1222 n = 14 cells). In E and F, data from all hunting events are plotted, whereas in the other plots  
1223 the mean or maximum for each larva is reported.

1224 **Video 2. Hunting behaviour evoked by optogenetic stimulation of a single pretectal**  
1225 **neuron.**

1226 Hunting behaviour evoked by optogenetic stimulation of a single ipsi-projecting  
1227 *KalTA4u508* neuron located in the left AF7-pretectum (this neuron is `Cell 4` in Figure 2F).  
1228 Tracking data is reported in Figure 3D,E. The video was acquired at 250 frames per second  
1229 and plays at 0.4 times the original speed. The raw movie is showed on the left, and a  
1230 background-subtracted inset centred on the larva is showed on the right.

1231 **Figure 4. Ablation of *KalTA4u508* pretectal neurons impairs hunting**

1232 **A** Laser ablation of *KalTA4u508* pretectal neurons and assessment of visuomotor behaviours.

1233 **B** Time-projection of larval behaviour (duration 8 s) showing trajectories of *Paramecia* and  
1234 larval zebrafish swimming in the arena.

1235 **C** Time course of behavioural tests, ablation and brain imaging.

1236 **D** Pretectal neurons before (top, 6 dpf) and 24 h after (bottom, 7 dpf) bilateral laser ablations  
1237 in a *KalTA4u508;UAS:mCherry;elavl3:itTA;Ptet:ChR2-YFP* larva. Images show maximum-  
1238 intensity projections (red channel, 10 planes, 10  $\mu\text{m}$  depth). A, anterior; P, posterior. Scale  
1239 bar, 20  $\mu\text{m}$ .

1240 **E** Quantification of cell ablation in left (blue) and right (red) AF7-pretectum (N = 14 larvae).

1241 **F–H** Assessment of hunting performance before and after bilateral ablation of *KalTA4u508*  
1242 neurons (N = 14 larvae). Mean  $\pm$  SEM is reported for each condition.

1243 **I** Average swim speed before and after ablations.

1244 **J–K** Loom-evoked escape behaviour before and after ablations.

1245 **L** OMR behaviour before and after ablations, quantified by rate of reorientation to a grating  
1246 drifting at 90° with respect to the fish in a fixed egocentric reference frame.

1247 **M** Hunting response probability for optogenetic stimulation of

1248 *KalTA4u508;UAS:mCherry;elavl3:itTA;Ptet:ChR2-YFP* larvae before and after ablation of  
1249 *KalTA4u508* pretectal neurons (N = 14 larvae).

1250 **N** Model of the neural circuit controlling hunting initiation. Two classes of AF7-pretectal  
1251 projection neuron are capable of inducing hunting behaviour. Contralaterally projecting  
1252 APN neurons are likely to induce hunting by recruiting activity in oculomotor and  
1253 locomotor pattern generating circuits in the mid/hindbrain tegmentum. Ipsilaterally  
1254 projecting AF7-pretectal neurons may recruit ipsilateral tectofugal pathways (Helmbrecht *et*  
1255 *al.*, 2018). Activation of anterior-ventral tectum requires AF7-pretectal neurons to induce  
1256 hunting and likely operates via the contralaterally projecting APN population because  
1257 unilateral avOT stimulation produces contralaterally directed responses (Fajardo *et al.*,  
1258 2013). APN, accessory pretectal nucleus.

1259 See also Figure 4—supplement 1,2, and Video 3.

1260 **Figure 4—supplement 1. Optogenetic induction of hunting in *elavl3:itTA;Ptet:ChR2-***  
1261 ***YFP;atoh7:gapRFP* larvae.**  
1262 **A** Dorsal view of ChR2-YFP expression in immunostained 6 dpf *elavl3:itTA;Ptet:ChR2-*  
1263 *YFP;atoh7:gapRFP* larvae registered to the ZBB brain atlas. Axonal projections of RGCs  
1264 labelled by the *atoh7:gapRFP* transgene are displayed in magenta (median of N = 6 fish).  
1265 Image represents a median of multiple registered single brains (N = 6 fish) and shows a  
1266 maximum-intensity projection through focal planes encompassing AF7-pretectal regions.  
1267 **B** ChR2-YFP expression in *elavl3:itTA;Ptet:ChR2-YFP;atoh7:gapRFP;lak<sup>-/-</sup>* larvae (median of N  
1268 = 7 fish). Note that no RGC axonal projections are present in the *lakritz* mutant.  
1269 **C** Overlap between ChR2-YFP and tERK immunostain in *elavl3:itTA;Ptet:ChR2-YFP* larvae,  
1270 computed as ratio between ChR2-YFP-positive voxels and tERK-positive voxels in each  
1271 brain region. Mean + SEM values are reported only for anatomical regions showing overlap  
1272 greater than zero (N = 6 fish). AF7-pretectum encompasses the ZBB masks `Optic tract -  
1273 AF7` and `Griseum tectale (AF7)`.  
1274 **D** Overlap between ChR2-YFP and tERK immunostain in control (blue) and *lakritz* (pink)  
1275 larvae (N = 7 fish).  
1276 **E** ChR2 expression relative to *KalTA4u508* neurons in a 6 dpf  
1277 *KalTA4u508;UAS:mCherry;elavl3:itTA;Ptet:ChR2-YFP* larva. Images are single focal planes  
1278 obtained from the left AF7-pretectum (plane 1 is dorsal relative to the other z-planes).  
1279 *KalTA4u508* neurons are not labelled with ChR2-YFP.  
1280 **F** Time sequence composite image showing selected frames from an example  
1281 optogenetically induced hunting sequence in a 6 dpf *elavl3:itTA;Ptet:ChR2-*  
1282 *YFP;atoh7:gapRFP;lak<sup>-/-</sup>* larva (see also Video 3).  
1283 **G** Vergence angle overlaid onto larval location during the optogenetically induced hunting  
1284 sequence from **F**. Asterisks indicate time of eye convergences (see also Video 3).  
1285 **H** Behavioural tracking of tail angle (grey) and ocular vergence angle (red) during the  
1286 example optogenetically induced hunting sequences shown in **F** and **G**. Asterisks indicate  
1287 time of eye convergences (see also Video 3).  
1288 **I** Fraction of larvae that performed eye convergences during optogenetic stimulations.  
1289 Opsin-positive larvae were either *elavl3:itTA;Ptet:ChR2-YFP;atoh7:gapRFP* or  
1290 *elavl3:itTA;Ptet:ChR2-YFP;atoh7:gapRFP;lak<sup>-/-</sup>*, whereas opsin-negative larvae were either  
1291 *atoh7:gapRFP* or *atoh7:gapRFP;lak<sup>-/-</sup>*. Numbers of responsive larvae are reported above the  
1292 bars.  
1293 **J** Response probability of larvae that performed eye convergence in at least one optogenetic  
1294 stimulation trial.  
1295 **K–R** Behavioural kinematics for optogenetically induced hunting events elicited in sighted  
1296 (blue, N = 13 larvae) and blind *lak<sup>-/-</sup>* (pink, N = 29 larvae) *elavl3:itTA;Ptet:ChR2-*  
1297 *YFP;atoh7:gapRFP* larvae. In **O** and **R**, data from all hunting events are plotted, whereas in  
1298 the other plots the mean or maximum for each larva is reported.  
1299 Scale bars, 100  $\mu$ m, except in **E**, 30  $\mu$ m. A, anterior; L, left; P, posterior; R, right.

1300 **Figure 4—supplement 2. No change in visuomotor behaviours in control larvae.**  
1301 **A–C** Assessment of *Paramecia* hunting in control  
1302 *KalTA4u508;UAS:mCherry;elavl3:itTA;Ptet:ChR2-YFP* larvae assessed at 6 and 7 dpf  
1303 (N = 16 larvae). Mean  $\pm$  SEM is reported for each group.  
1304 **D** Average swim speed in control larvae.

- 1305 **E–F** Loom-evoked escape behaviour in control larvae.  
1306 **G** OMR performance in control larvae.  
1307 **H** Hunting response probability upon optogenetic stimulation of avOT in control larvae.
- 1308 **Video 3. Hunting behaviour evoked by optogenetic stimulation of the anterior-ventral**  
1309 **optic tectum.**  
1310 Optogenetically induced hunting behaviour in a *elavl3:itTA;Ptet:ChR2-YFP;atoh7:gapRFP;lak<sup>-/-</sup>*  
1311 larva. Tracking data is reported in Figure 4–supplement 1F–H. The video was acquired at  
1312 250 frames per second and plays at 0.4 times the original speed. The raw movie is showed  
1313 on the left, and a background-subtracted inset centred on the larva is showed on the right.

# Figure 1

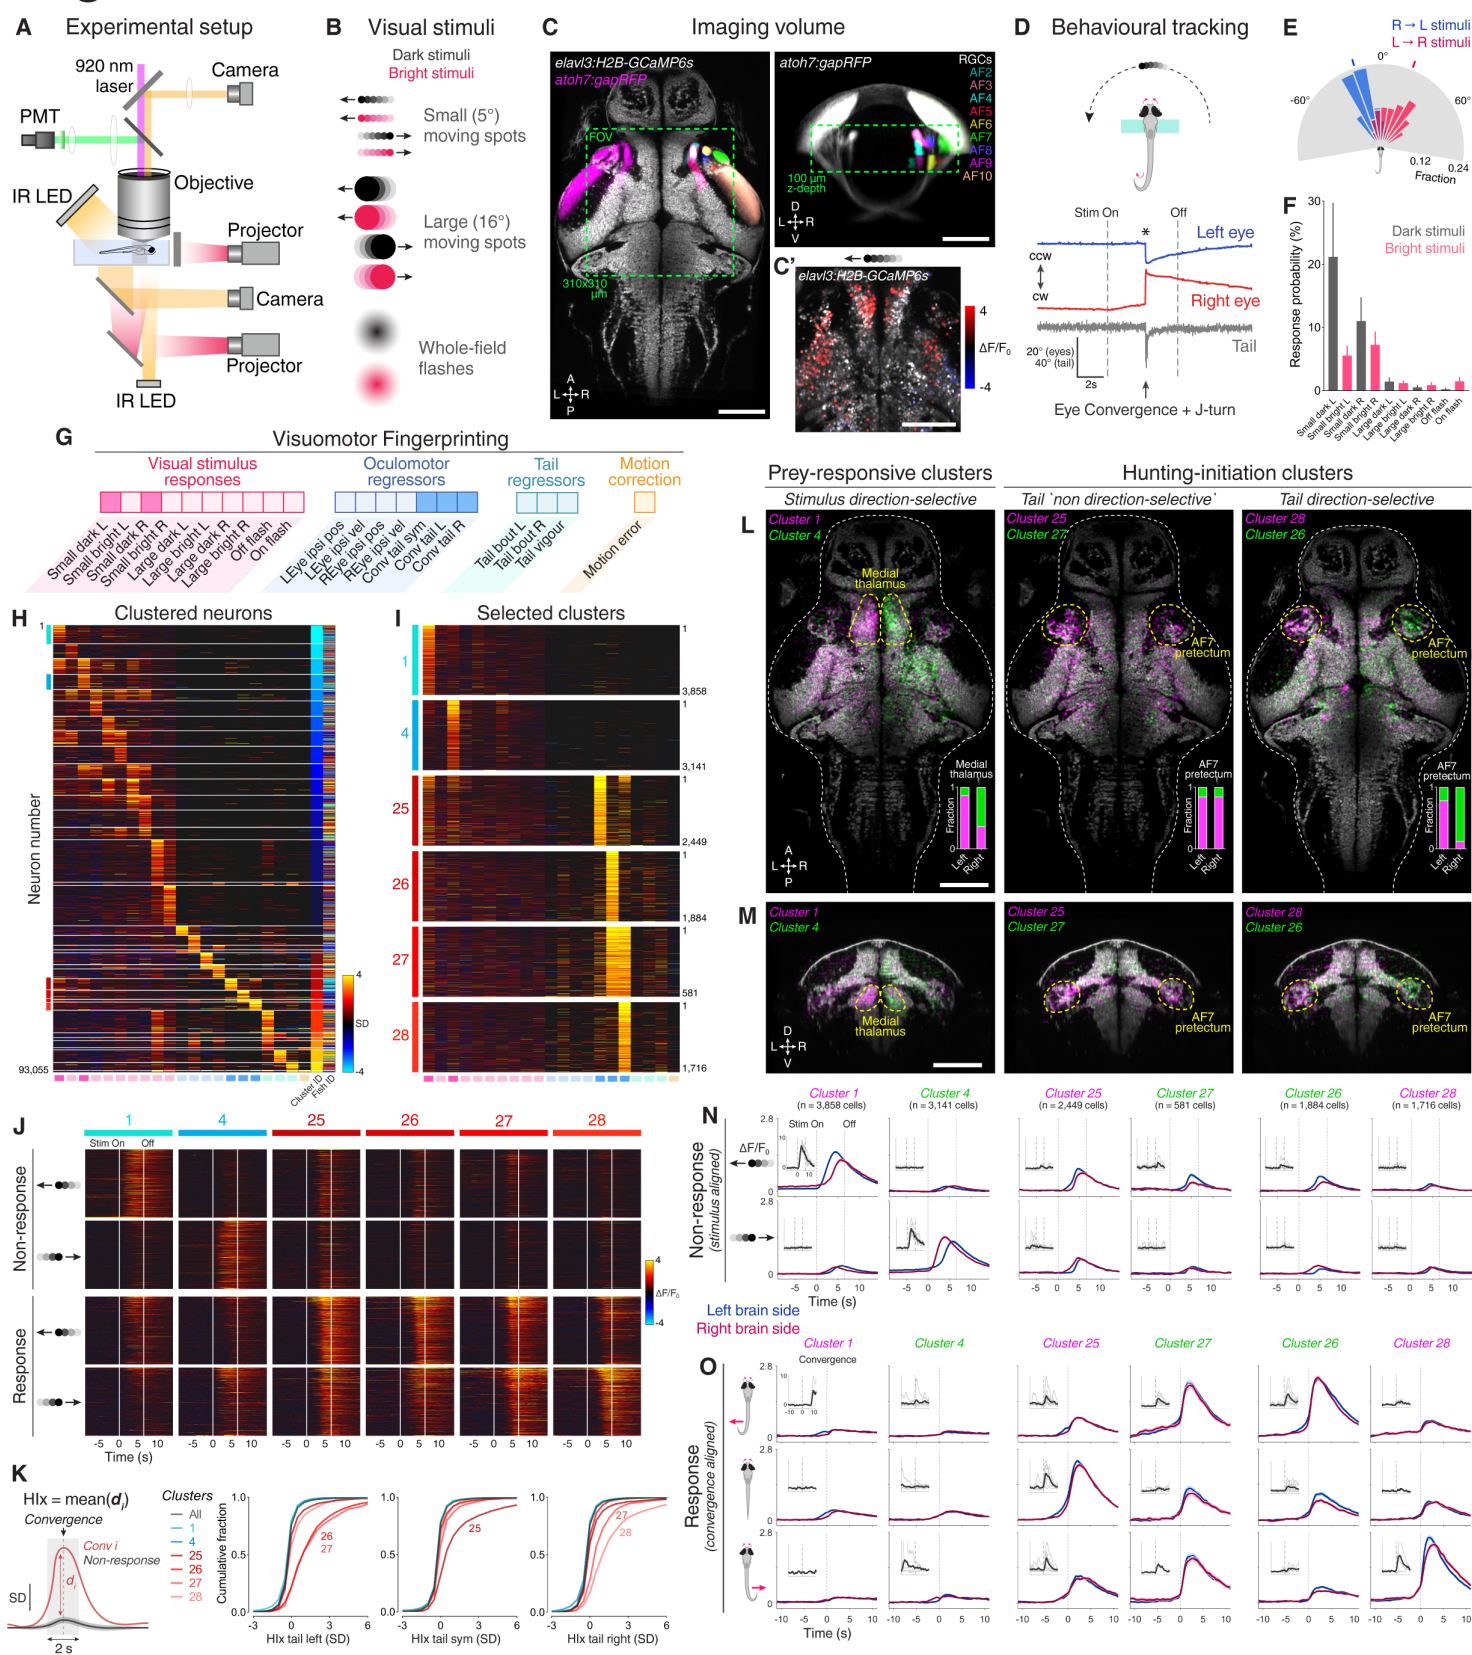

## Figure 1-supplement 1

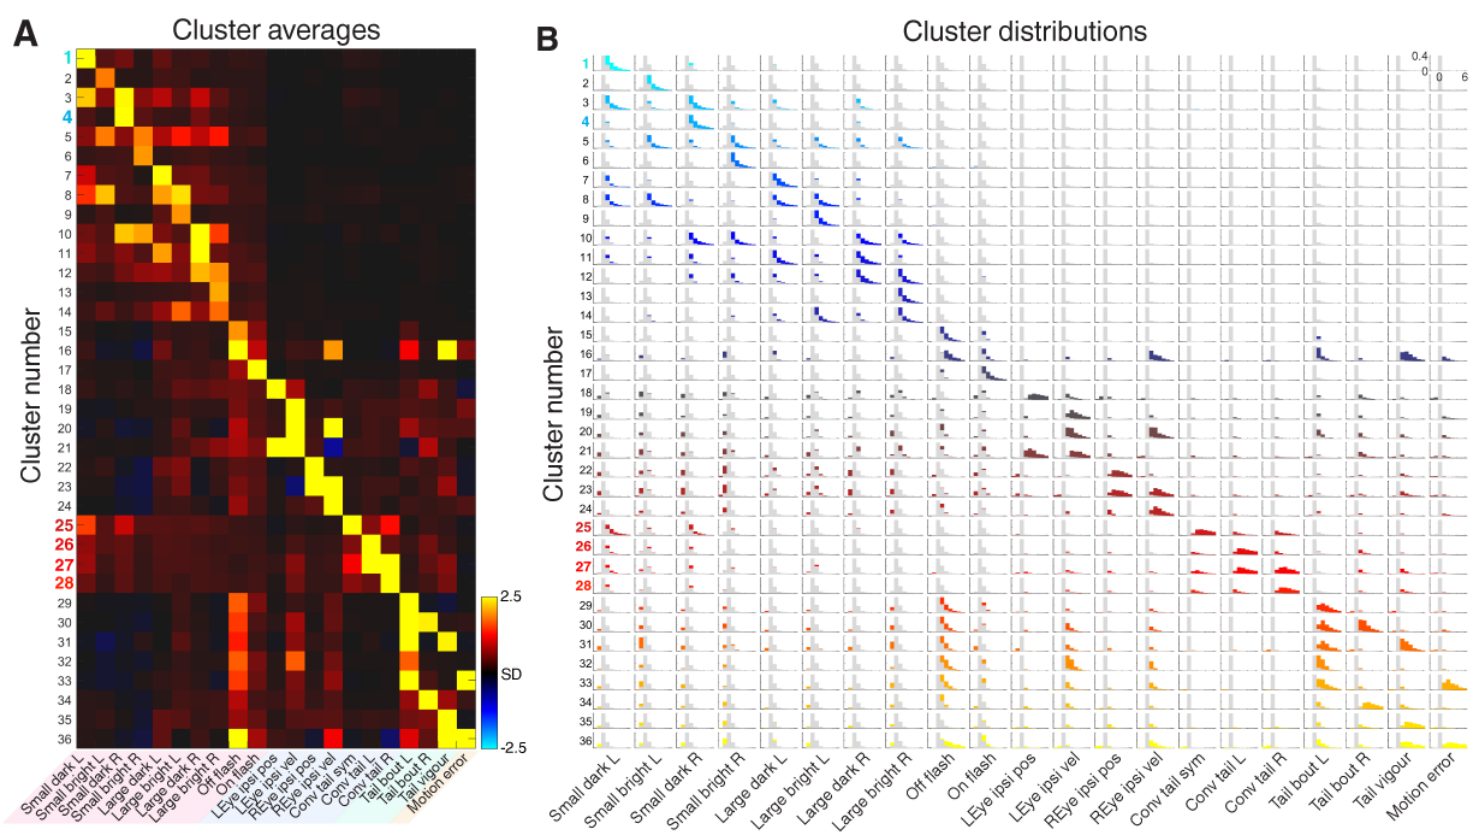

## Figure 1-supplement 2

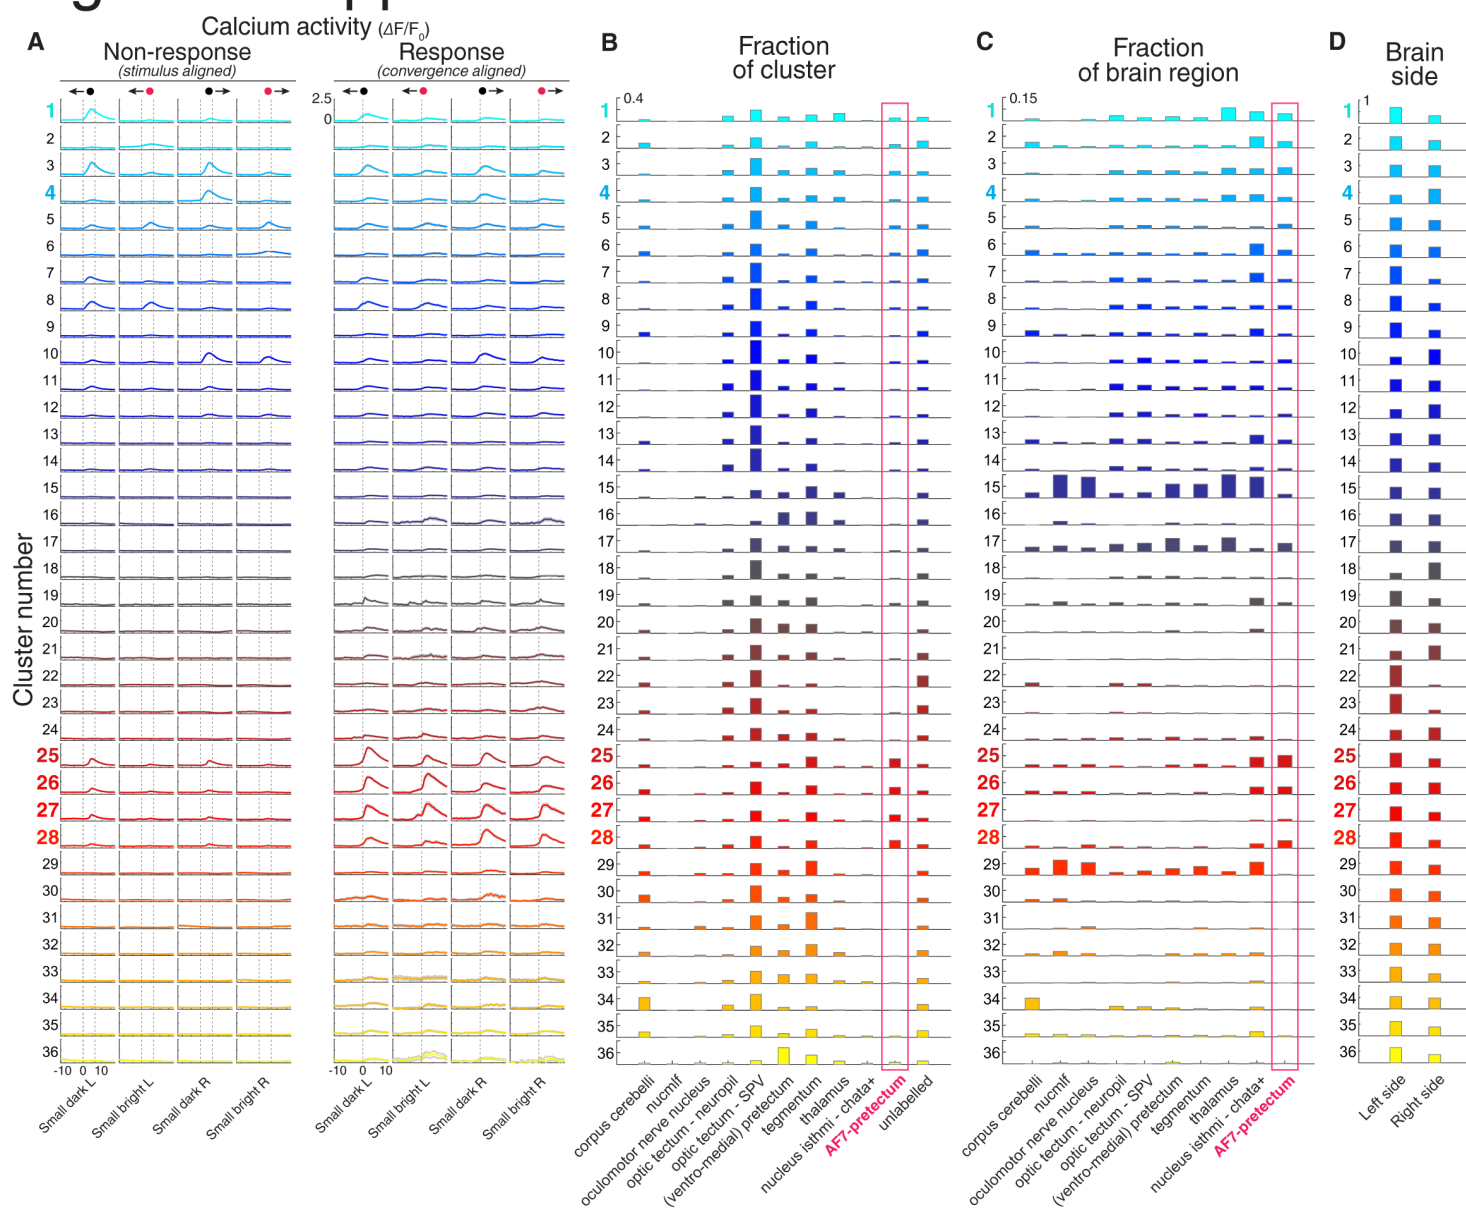

# Figure 1–supplement 3

## Anatomical maps of clusters

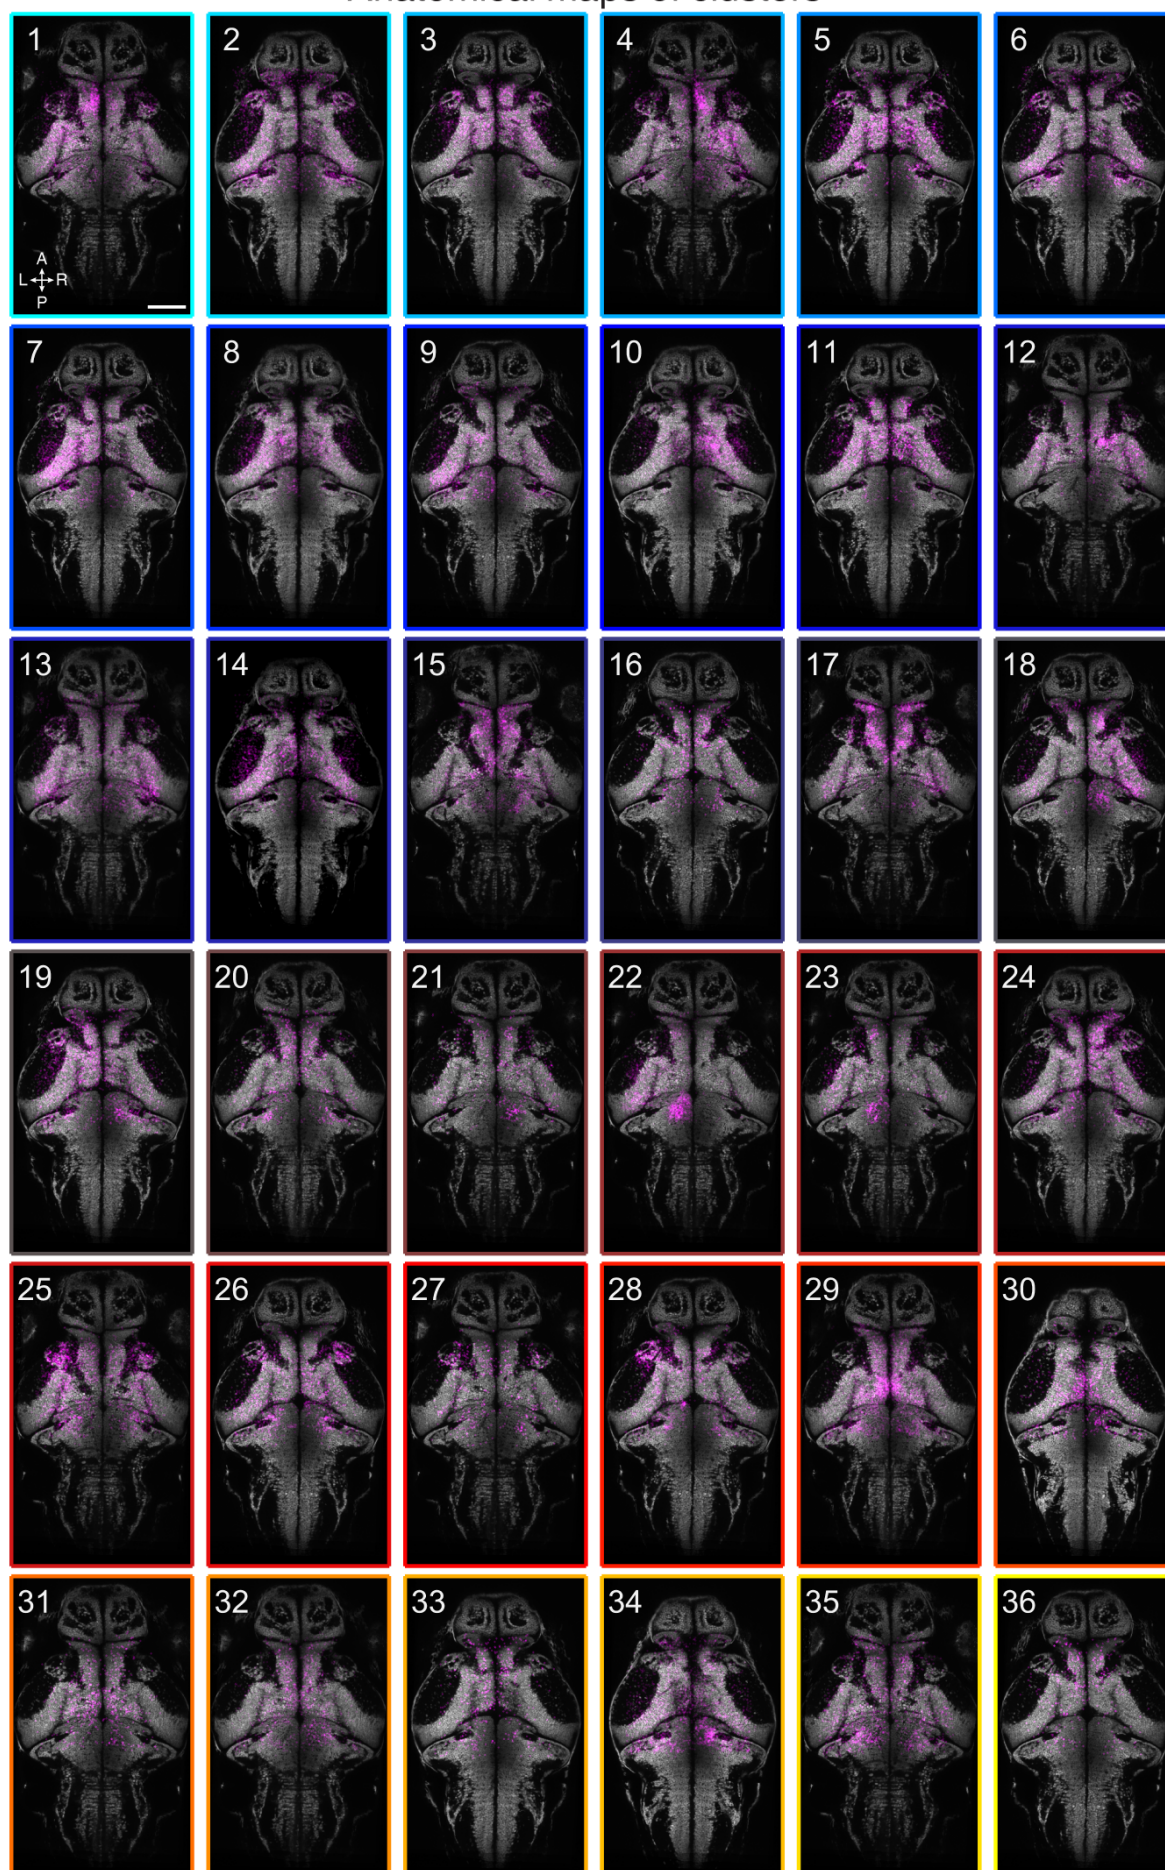

# Figure 2

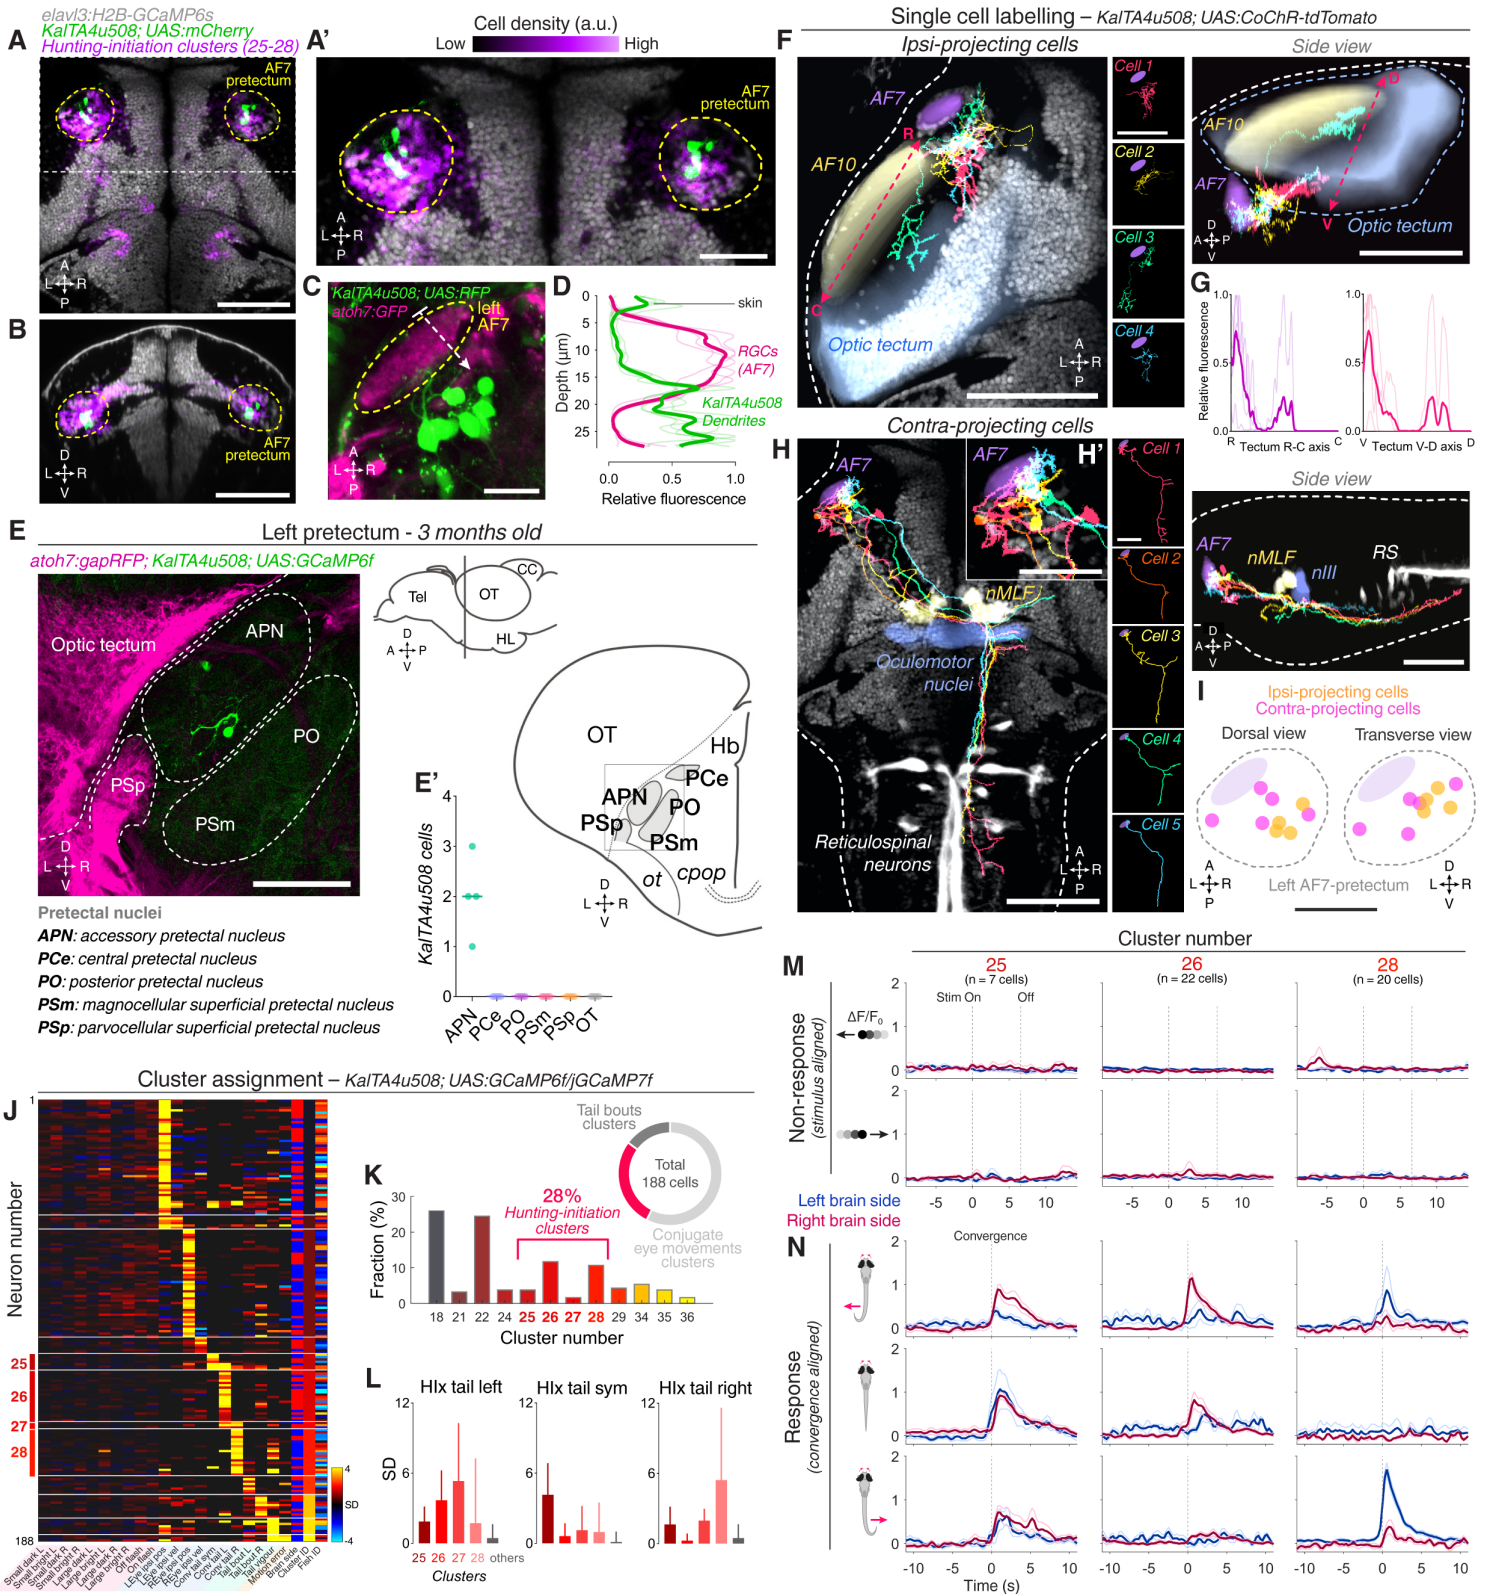



# Figure 2–supplement 1

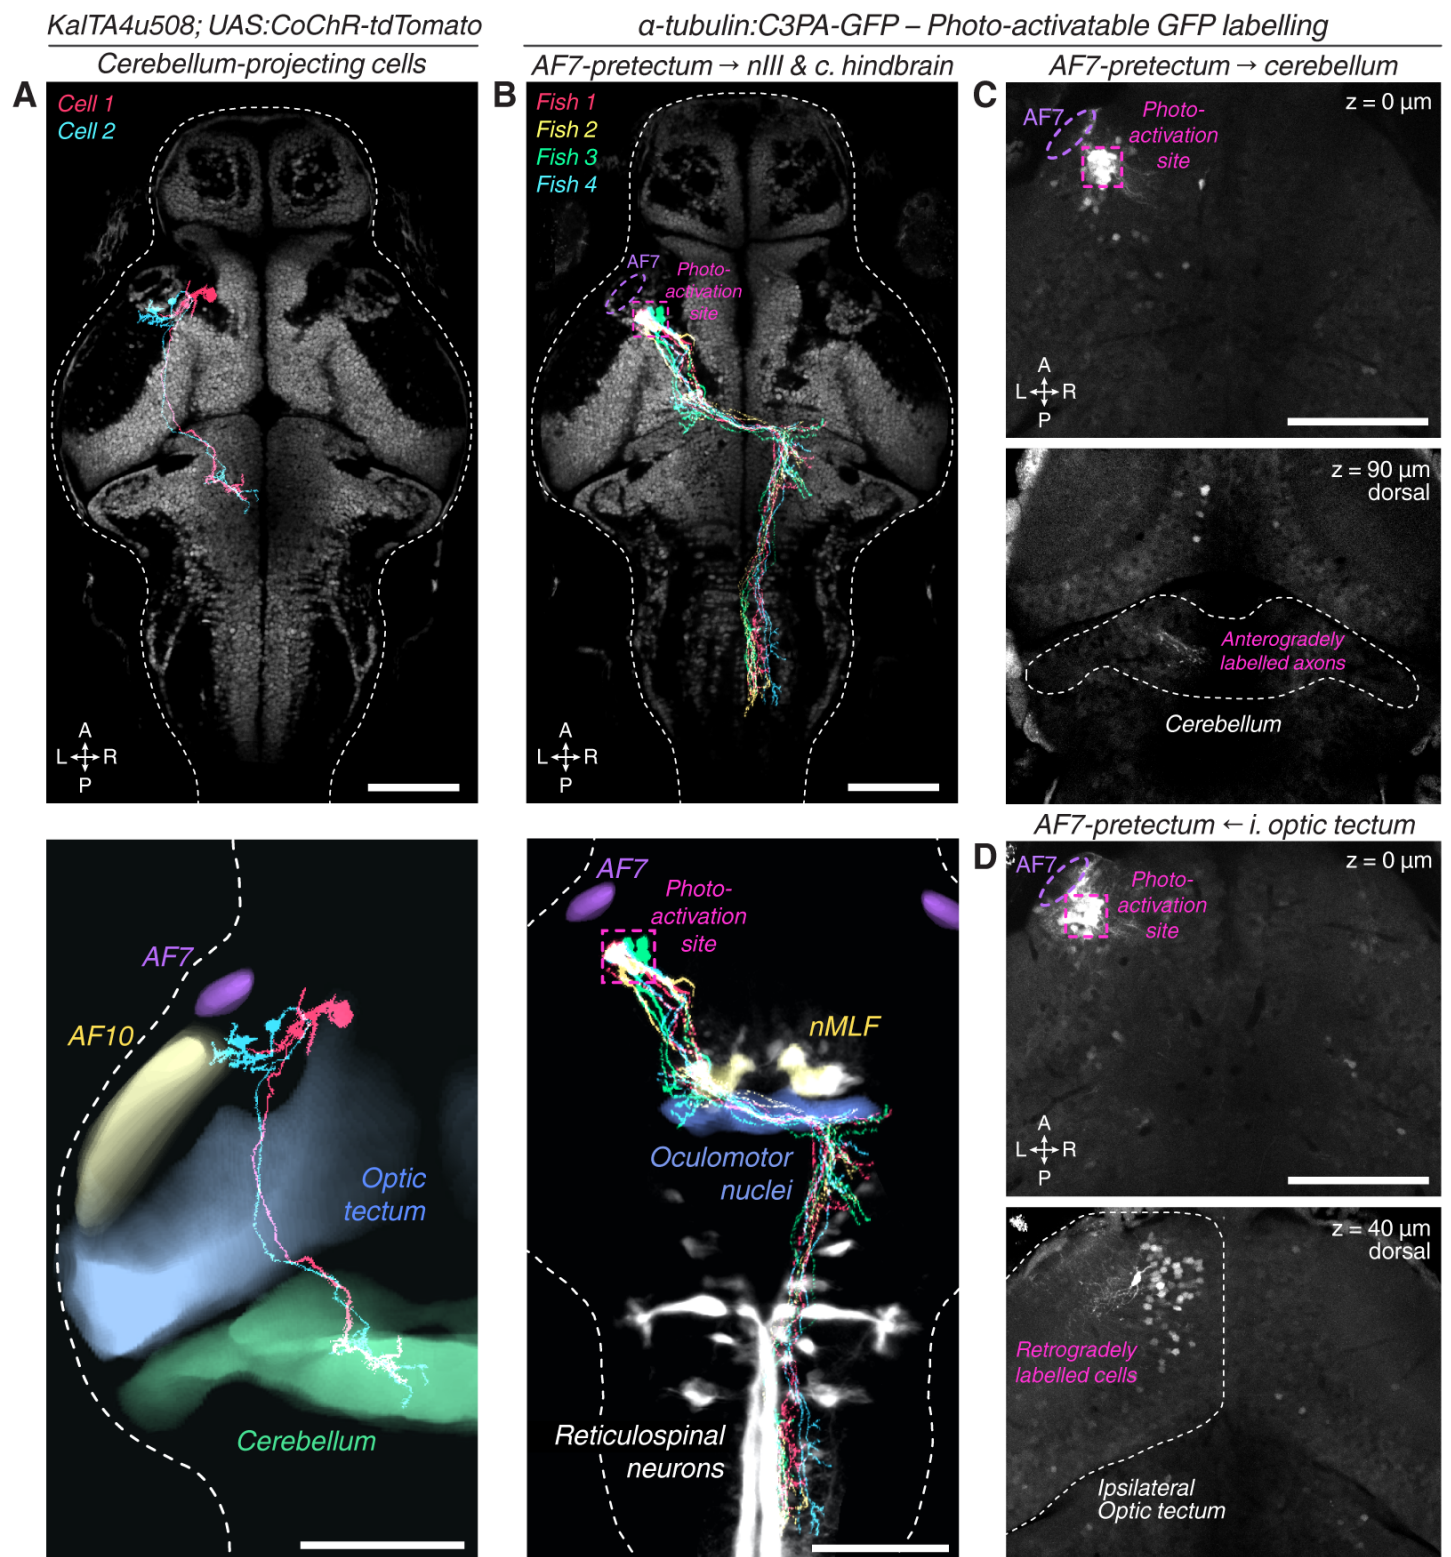

# Figure 3

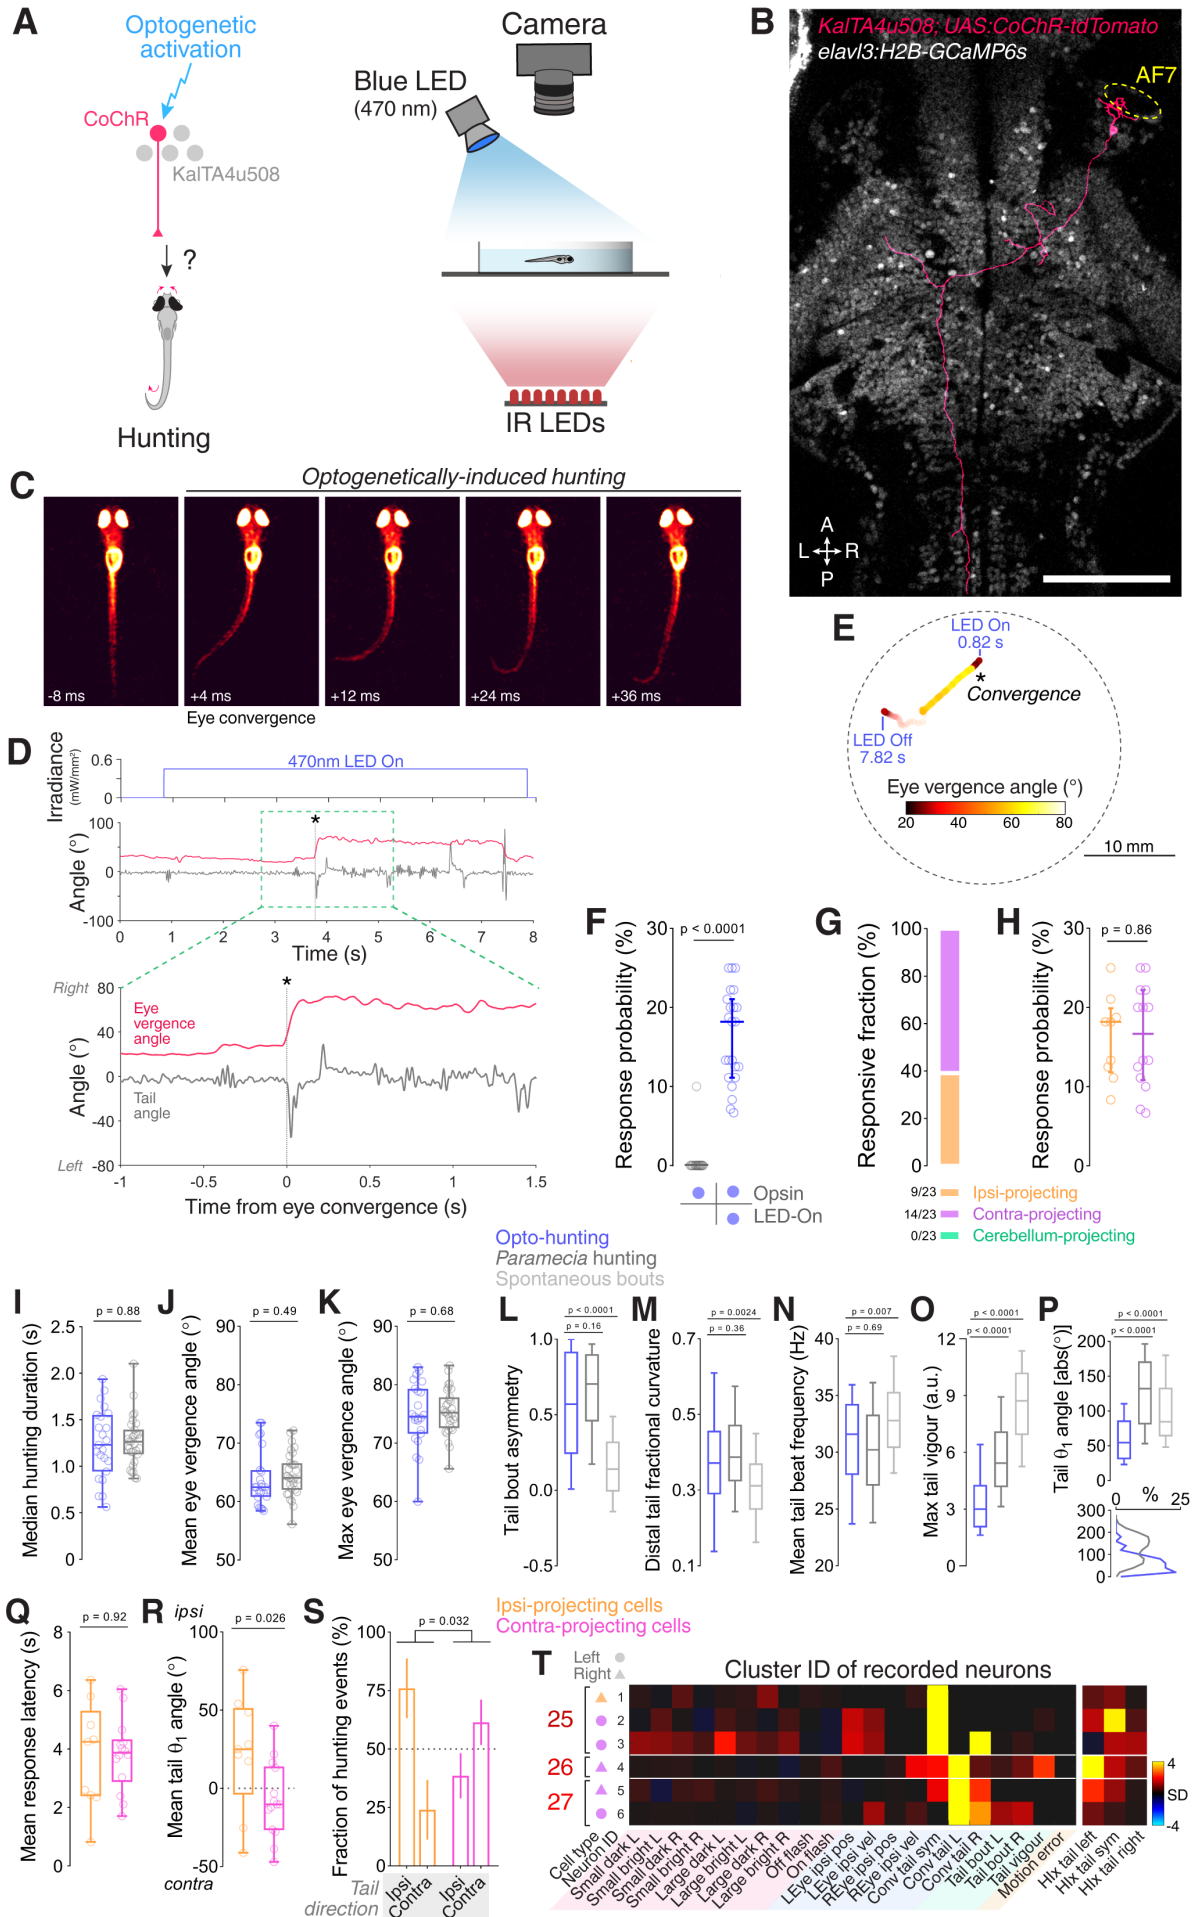

## Figure 3–supplement 1

Ipsi-projecting cells  
Contra-projecting cells

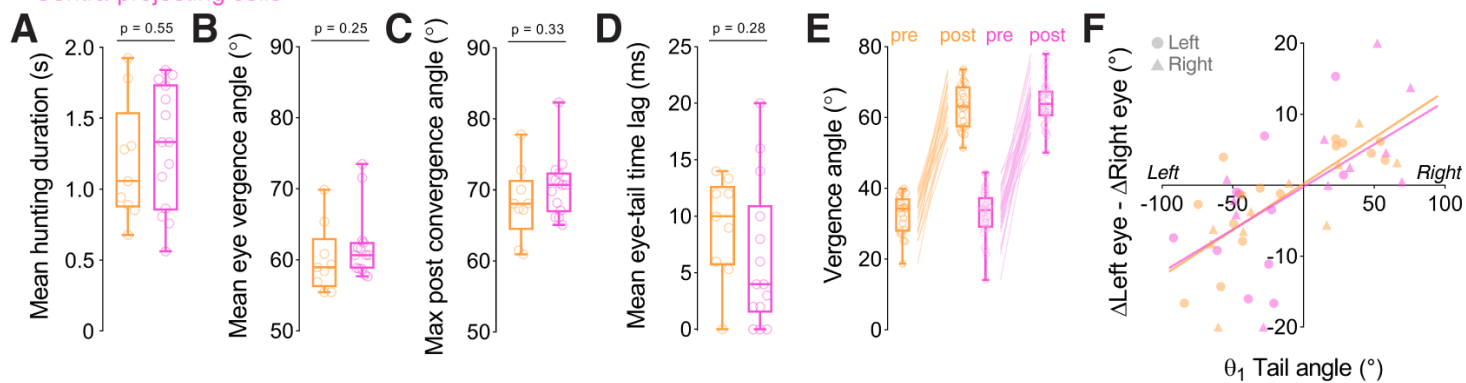

# Figure 4

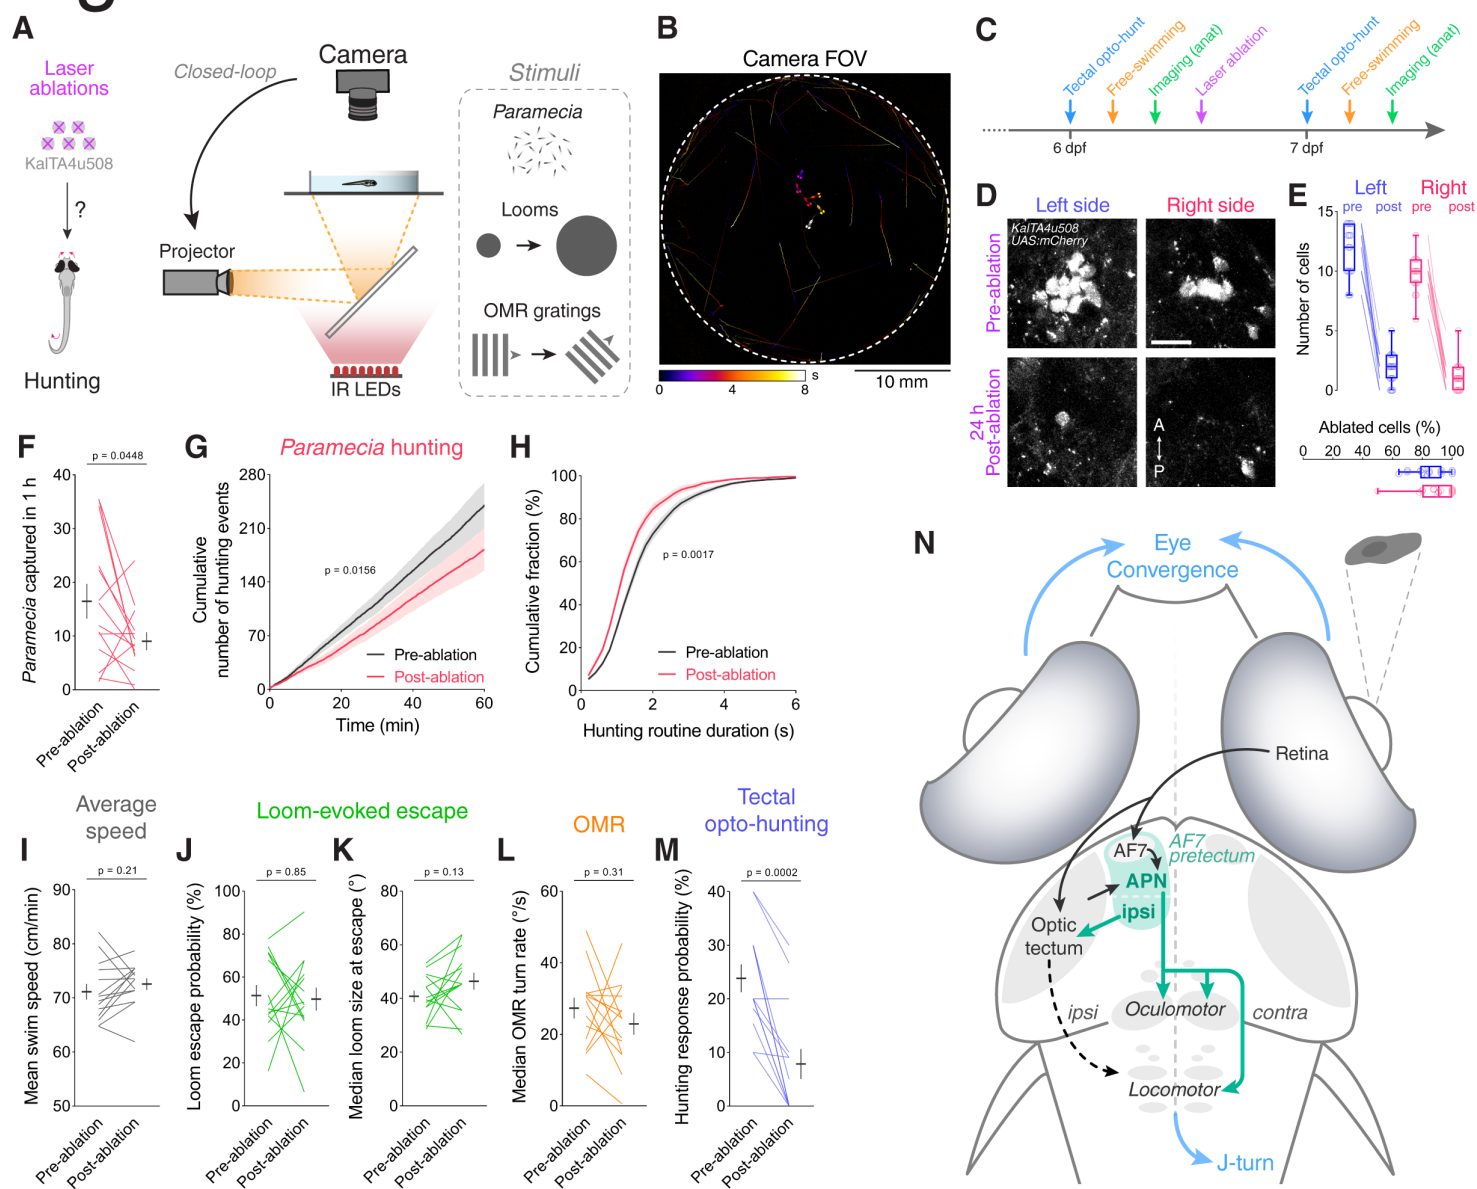

## Figure 4-supplement 1

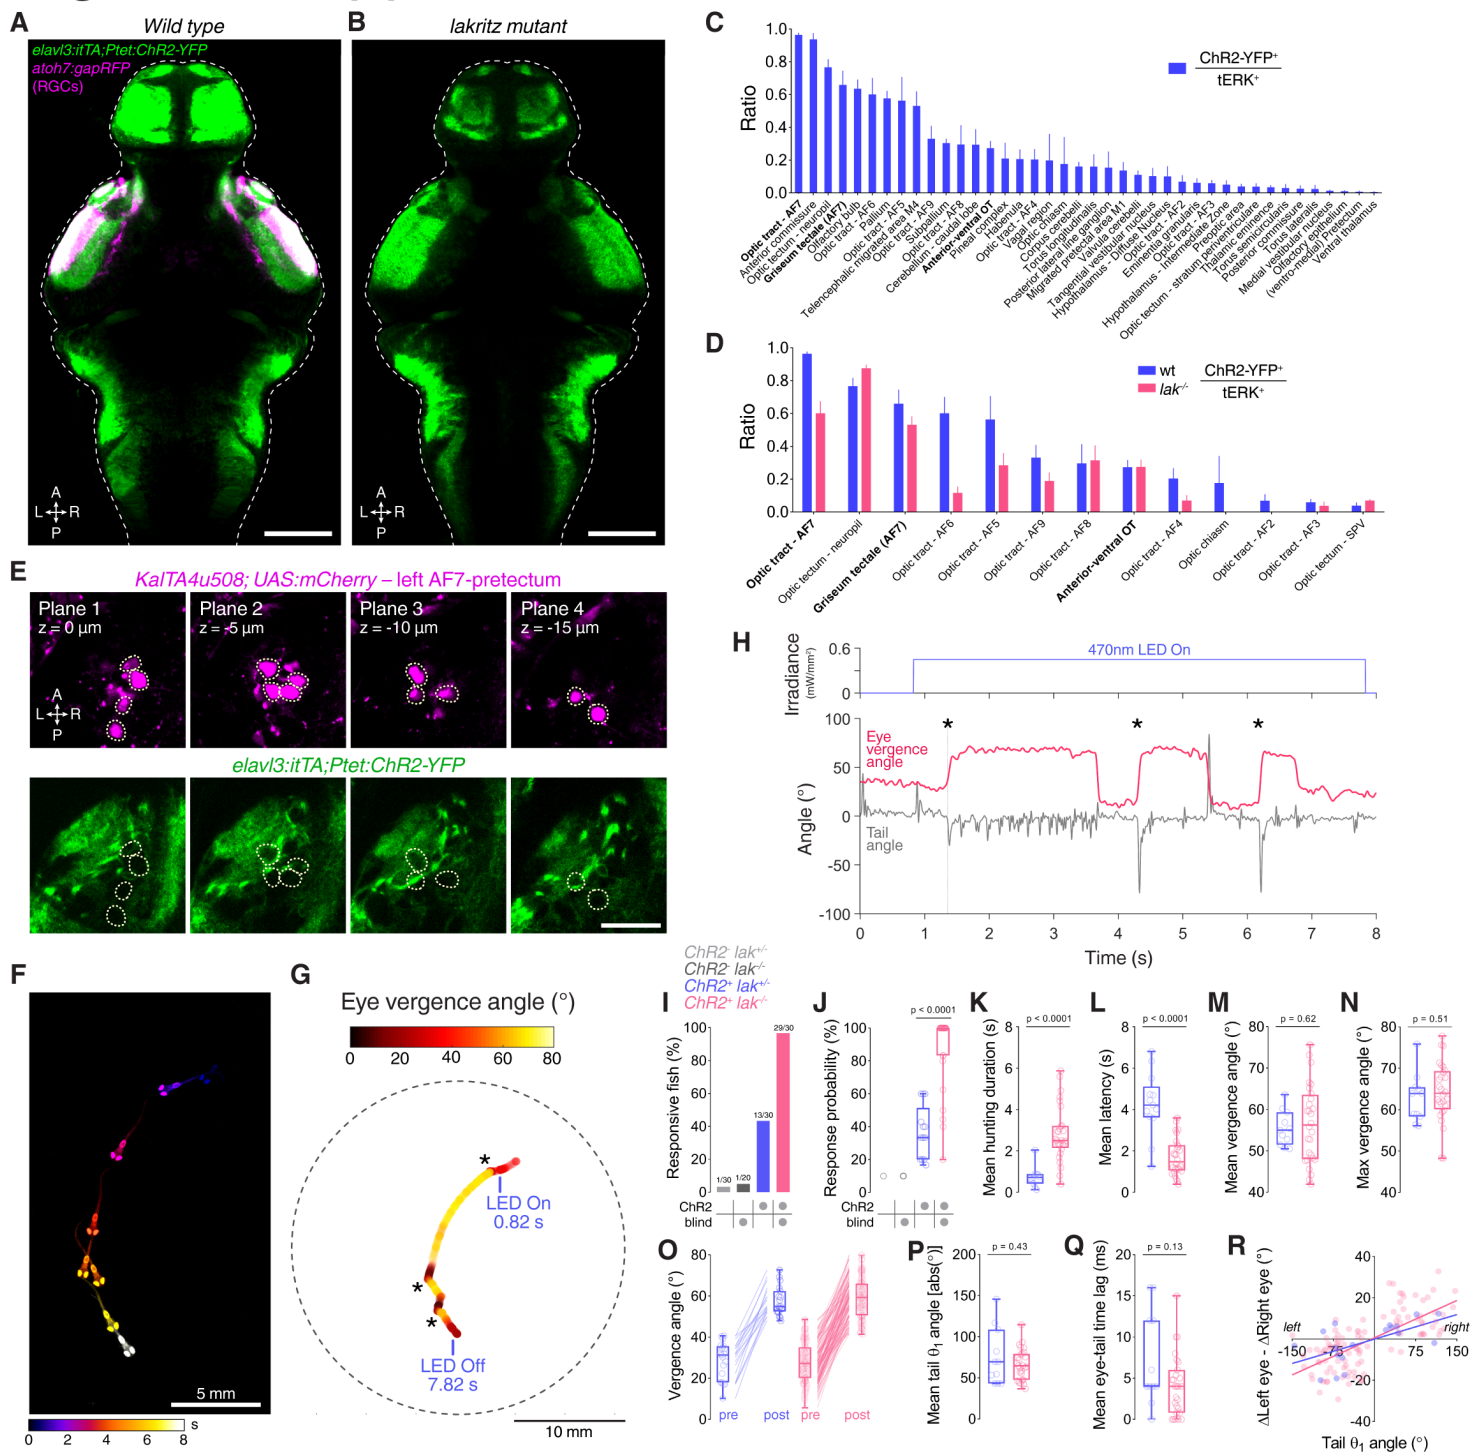

## Figure 4-supplement 2

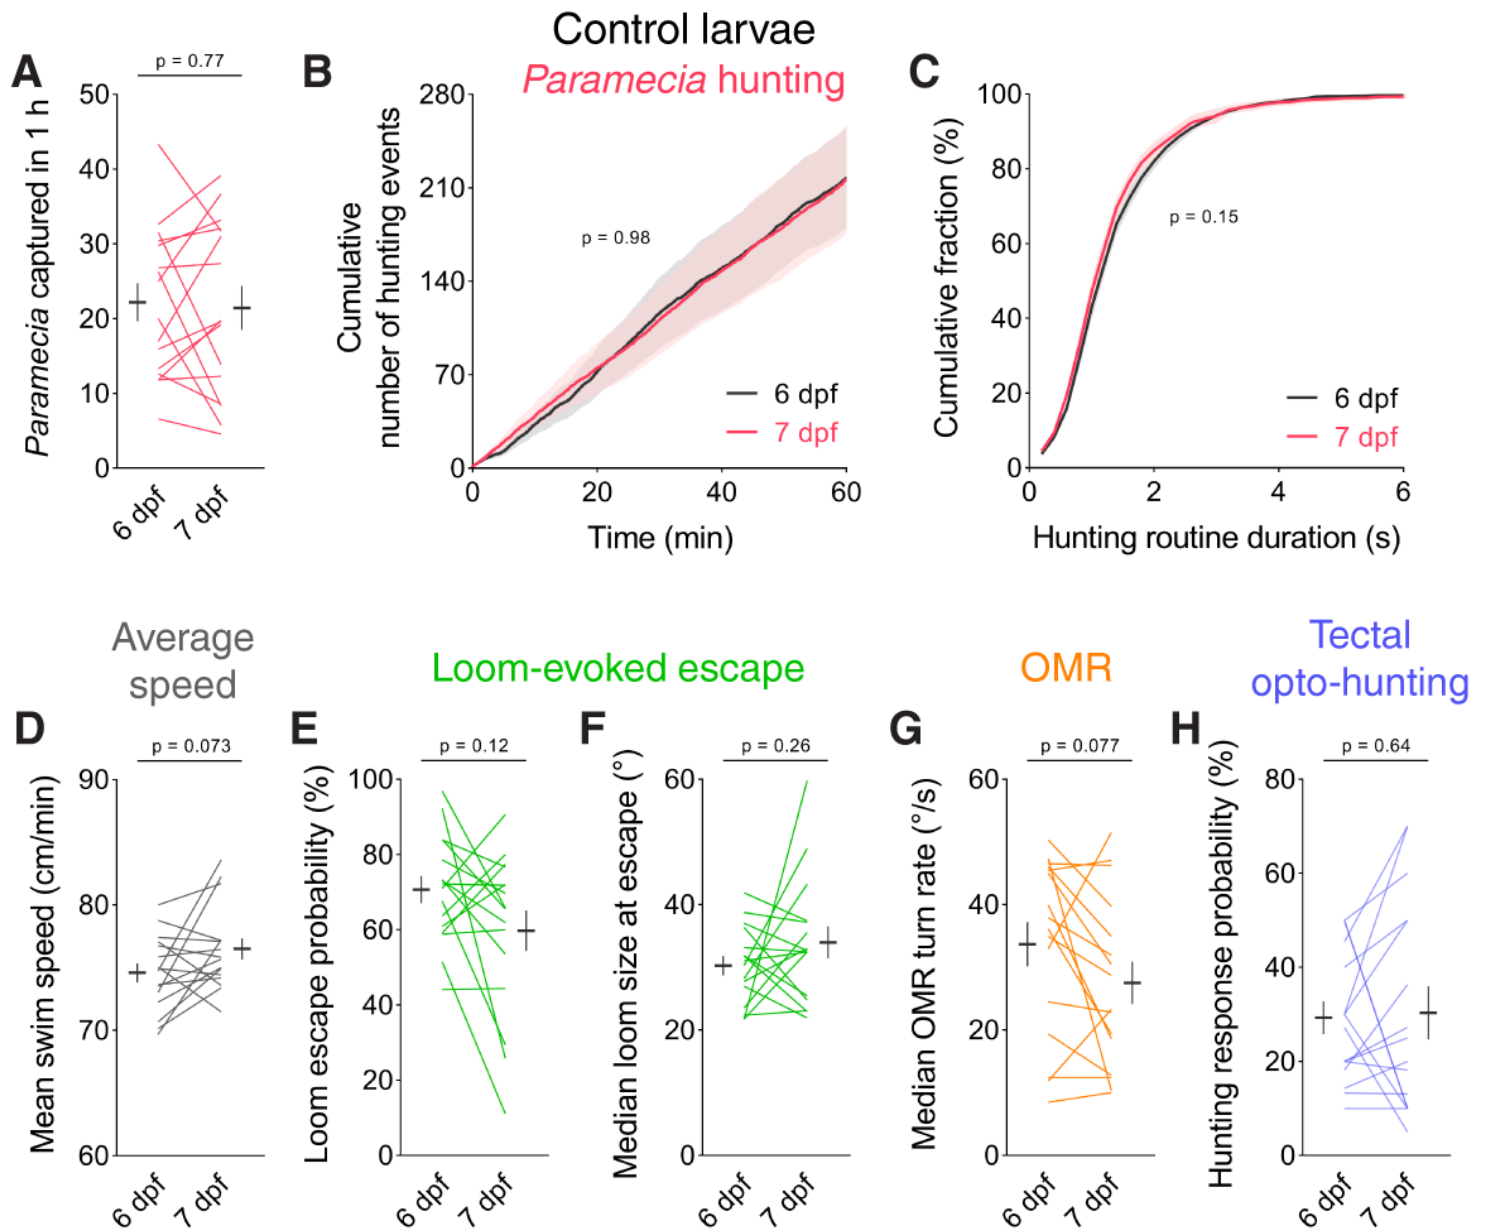

Source: https://www.biorxiv.org/content/10.1101/637215v1.full.pdf
